# Supplementary material
Source: PubMed Central journal article supplement (PMC4968760)
Supplement: pnas.1520964113.sapp.pdf [file pnas.1520964113.sapp.pdf]

## **Supplementary Information**

### **Robust high-performance nanoliter-volume single-cell multiple displacement amplification on planar substrates**

Kaston Leung, Anders Klaus, Bill K. Lin, Emma Laks, Justina Biele, Daniel Lai, Ali Bashashati, Yi-Fei Huang, Radhouane Aniba, Michelle Moksa, Adi Steif, Anne-Marie Mes-Masson, Martin Hirst, Sohrab P. Shah, Samuel Aparicio, Carl L. Hansen

## **SI Materials and methods**

### **Nanoliter-volume reaction formulation**

All reagents and cell suspensions were dispensed onto the substrate using a non-contact piezoelectric spotter (S3, Scienion). A PDC 70 nozzle with a type 4 coating was used for all cell suspensions and reagents with the exception of the alkaline lysis solution for which an uncoated PDC 50 nozzle was used (all nozzles supplied by Scienion). Piezoelectric voltage and pulse width settings were adjusted for each dispensed reagent in order to achieve stable droplet formation. Nanoliter-volumes of reagents were assembled by dispensing droplets with volumes ranging from 100-400 pL at a frequency of 500 Hz, which coalesced on the substrate. The substrate was placed on a water-cooled chuck cooled to approximately 6°C during all dispensing steps to minimize evaporation without inducing condensation on the substrate. Prior to any heating steps, the droplet array was covered by approximately 2 mL of light mineral oil using a pipette, in order to minimize evaporation in the aqueous reaction droplets. All oil was then removed by pipette prior to any subsequent reagent addition.

### **Fabrication of substrate:**

For robust addition of reagents to nanoliter-volume droplets on the substrate, the non-contact liquid dispenser used requires removal of all oil covering the droplets prior to deposition of additional reagents. The hydrophobicity of the substrate was thus adjusted such that deposited aqueous droplets remained immobilized during addition and removal of oil, and did not excessively spread out, causing possible cross-contamination with other neighbouring droplets on the substrate. Glass slides (75 mm x 50 mm) were spin coated with a 30 µm-layer of polydimethylsiloxane (PDMS) (Momentive). PDMS barriers, which keep the mineral oil on the reaction array (Fig. 1B), were fabricated by pouring liquid PDMS into a polymethylmethacrylate mold, which was then degassed in a vacuum chamber to remove air bubbles that may interfere with bonding of barriers to the slides. The PDMS base to curing agent ratio was 10:1 (by mass). The PDMS-coated slides and barriers were baked for 24 hrs at 80°C, then stored for future use at room temperature. Immediately prior to an experiment, barriers were bonded to the slides by plasma oxidation and the assembled substrates were baked for 20 min at 80°C. This plasma treatment served to both bond the barrier to the slide and to decrease the hydrophobicity of the PDMS surface. Substrates were then DNA decontaminated by exposure to 4 J/cm<sup>2</sup> of UV radiation using a UV oven.

### **Cell culture**

184-hTERT cells were cultured at 37°C in 5% CO<sub>2</sub> in MEBM Mammary Epithelial Cell Basal Medium (Lonza) with 5 µg/mL transferrin (Sigma) and 2.5 µg/mL isoproterenol (Sigma). The media was further supplemented with MEGM Mammary Epithelial Cell Growth Medium Singlequots (Lonza) of 2 mL bovine pituitary extract, 0.5 mL hEGF, 0.5 mL insulin, and 0.5 mL hydrocortisone.

TOV2295 cells were cultured at 37°C in 5% CO<sub>2</sub> in a 1:1 mixture of MCDB 105 / M199 (Sigma) supplemented with 10% fetal bovine serum.

### **Preparation of cells and nuclei**

Cultured, frozen 184-hTERT and TOV2295 cells were thawed at room temperature. 150 µL of cells was washed with 1100 µL PBS in a 1.5 mL tube. The washed cells were pelleted by centrifugation at 2500 rpm and 4°C for 5 min and the supernatant was discarded. After a second wash and spin, the cells were resuspended in PBS with 5% glycerol. The glycerol serves to reduce evaporation of the nanoliter-volume droplets on the substrate. Additional PBS with 5% glycerol was added as necessary to achieve a concentration of approximately 1 cell per 8 nL, which was confirmed by haemocytometer. SYTO9 nucleic acid stain (Life Technologies) was added to the suspension to a final concentration of 15 µM.

Unsorted 184-hTERT nuclei were prepared by thawing cultured frozen 184-hTERT cells. 300 µL of cells was mixed with 300 µL of EZ lysis buffer (Sigma) in a 1.5 mL tube and incubated for 5 minutes on ice. 500 µL of PBS were added to the lysed cells and nuclei were pelleted by centrifugation at 2500 rpm and 4°C for 5 min. The supernatant was discarded and the nuclei were resuspended in PBS with 5% glycerol. After filtering using a 70 µm filter, additional PBS with 5% glycerol was added as necessary to achieve a concentration of approximately 1 cell per 8 nL, which was confirmed by haemocytometer.

184-hTERT nuclei sorted by cell cycle were prepared as above but resuspended in 1 mL PBS. 2 µL of propidium iodide (PI) stain (Life Technologies) was added and nuclei were filtered through a second 70 µm filter prior to sorting. G<sub>1</sub>, S, and G<sub>2</sub> populations were differentiated by DNA content, as determined by the relative fluorescence of PI stain, and sorted into separate 1.5 mL tubes using a FACSAria III instrument (BD Biosciences). After sorting, nuclei were diluted as necessary with PBS with 5% glycerol to achieve a concentration of approximately 1 nucleus per 8 nL.

For primary samples, three 40 µm wide cryosections were mechanically homogenized in a tube containing 1 mL EZ lysis buffer (Sigma) using a laboratory paddle-blender. The homogenized tissue was then filtered with a 70 µm filter and washed with PBS as described above. The washed nuclei were resuspended in 1 mL PBS and 2 µL of propidium iodide stain (Life Technologies) was added. Nuclei were filtered through a second 70 µm filter and sorted and diluted as described above.

The SYTO9 stain, PBS, and glycerol were all DNA decontaminated prior to use by exposure to 4 J/cm<sup>2</sup> of UV radiation using a UV oven.

### **Cell deposition and identification**

Prepared cell/nuclei suspensions were deposited onto the substrate in 8 nL droplets. The number of cells deposited at each position was visually determined by manual

fluorescent/brightfield microscopy using a fluorescent microscope (Leica) equipped with filters for excitation and emission wavelengths of SYTO9.

### **Cell lysis and multiple displacement amplification**

To lyse cells and nuclei and denature double-stranded genomic DNA, 6 nL of alkaline lysis buffer consisting of 400 mM KOH, 10 mM EDTA, and 100 mM DTT (pH ~13) was added to each droplet. The droplet array was then covered with light mineral oil, and reactions were incubated at 65°C for 10 min by placing the substrate onto a flatbed thermocycler (Bio-Rad). The oil was then removed and 6 nL of neutralization buffer consisting of 1 M TrisHCl (pH ~4) was deposited on each droplet to neutralize the alkaline buffer. 80 nL of REPLI-g Single Cell Master mix (REPLI-g Single Cell Kit, Qiagen) supplemented with 0.1% Tween 20 surfactant and 5% glycerol was then added to each droplet and the array was again covered with light mineral oil. The MDA reactions (100 nL total volume) were then incubated at 30°C for the specified incubation time, after which amplification was terminated by heating to 65°C for 15 min. The mineral oil, alkaline lysis buffer, neutralization buffer, water, glycerol, and Tween 20 were all DNA decontaminated prior to use by exposure to 4 J/cm<sup>2</sup> of UV radiation using a UV oven.

### **Extraction of amplified DNA**

After amplification, mineral oil was removed and approximately 250 nL of inert blue dye (Bio-Rad) was added to all reactions chosen for further processing in order to aid with visualization of the droplets to make manual extraction by pipette easier. The array was then covered with light mineral oil and reaction droplets were extracted by pipette and transferred into 30 µL of 0.1 mM EDTA TE buffer (Teknova) in 96-well plates. MDA yield was assessed by measuring the DNA concentration of 2 µL of diluted MDA product using the Qubit dsDNA HS Assay Kit (ThermoFisher).

### **Whole genome library preparation and sequencing**

5 ng of MDA product was used for sequencing library construction. DNA was fragmented by Covaris shearing, end-repaired, and A-tailed. Illumina adaptors were ligated to the fragments and the library was amplified by limited-cycle PCR, during which samples were barcoded. Samples were sequenced using a MiSeq (Illumina), generating 75 bp paired-end reads. Samples chosen for additional high-depth sequencing were further sequenced on a HiSeq 2500 (Illumina), generating 125 bp paired-end reads.

### **Alignment and analysis of whole genome sequencing data**

Sequencing reads were trimmed of adaptor and barcode sequences by Illumina software on the sequencing instrument. Unaligned sequencing data (fastq files) from other published studies was downloaded from the NCBI online database. All sequencing data was aligned to the GRCh37-lite reference genome using Bowtie 2 (version 2.2.5) with minimum and maximum fragment lengths set to 80 and 500 respectively. Aligned data was sorted and PCR duplicates

were marked using Picard Tools (version 1.119). SAMtools (version 1.2) was used to index aligned, sorted data.

Statistics shown in SI Appendix, Table S3 were calculated considering the entire reference genome using Bedtools (version 2.23.0) after downsampling all samples to the same number of total sequenced bases. In samples for which bulk data was available, Control-FREEC (1) was used to identify regions of the genome containing large scale CNVs. These regions were omitted from subsequent analyses in the analysis of all single cell samples (SI Appendix, Table S2).

Comparison of all samples using binned reads was performed as follows. The HMMcopy (2) readcounter function was first used to determine the number of aligned reads, excluding duplicate reads, falling within fixed-width bins across the genome for each sample. The mean number of reads per bin of the sample with the fewest reads was then found, and a binomial distribution was then used to randomly downsample binned reads of all other samples, resulting in equal mean numbers of reads per bin across all samples. This ensured that the same quantity of aligned data was compared for all samples. For the 184-hTERT samples binned into 10 kb and 100 kb bins, HMMcopy functions in R were then used to correct downsampled binned reads for biases due to the GC content and mappability of each bin. For all other sample datasets, correction for GC content was performed but correction for mappability was not. Instead, only bins with a mappability score  $\geq 0.85$  were considered.

Power spectra plots were generated by concatenating the 1 kb binned read depths for each sample and considering only the number of bins of the sample with the smallest reference. Binned read depths were then entered into the R function periodogram in the “Genecycle” package (<http://CRAN.R-project.org/package=GeneCycle>), which estimates power spectral density by generating a smoothed periodogram using the command “periodogram([binned read depths], method = “smooth”)”. Lorenz curves were generated from the high depth sequencing data by downsampling all samples to the same depth, defined as the number of aligned bases divided by reference size (taking into consideration omitted genomic regions in each cell type). To generate breadth vs. depth curves, each sample was downsampled to between 0.5x and 5x sequencing depth relative to its reference at increments of 0.5x and Bedtools was used to calculate coverage breadth at each depth.

CNVs were called using the HMMcopy software package, which takes in normalized binned read depth, groups contiguous bins into segments predicted to have equal copy number, and assigns a copy number to bins in each segment using a Hidden Markov Model (2). For all sample datasets except for the 184-hTERT samples binned into 10 kb and 100 kb bins, the following custom HMMcopy parameters were used for CNV-calling. Seven copy number states were used; the m values were set to 0, 0.5, 1.0, 1.5, 2.0, 2.5, 3.0 for copy number states 0 to 6 respectively; the mu values were set to 0, 0.5, 1.0, 1.5, 2.0, 2.5, 3.0 for copy number states 0 to 6 respectively; the kappa values were set to 25, 50, 800, 50, 25, 25, 25 for copy number states 0 to 6 respectively; the e value was set to 0.995; and the S value was set to 35. To find the concordance between copy number states of bins of single-cell samples and bulk DNA in

184-hTERT cells (SI Appendix, Fig. S7 and S8), only bins with a mappability score above 0.85 were considered.

Due to low numbers of aligned reads, the G1-phase 184-hTERT single-cell sample with sample name “G1\_phase\_S61” was omitted from the analysis using low depth WGS data, and the G1-phase 184-hTERT single-cell sample with sample name “G1\_phase\_S66” was omitted from the analysis using high depth WGS data. There is thus no 1 Mb-bin read depth plot for G1\_phase\_S61 and no 100 kb-bin and 10 kb-bin read depth plots for G1\_phase\_S66 in the supplementary datasets. One of the custom microfluidic single-sperm samples was omitted from the generation of the mean power spectra plots because it had an extremely irregular power spectrum. Its inclusion would not have lowered the amplitude of the mean power spectrum for that sample group.

### **Targeted sequencing library preparation and data analysis**

A panel of 48 primer pairs were designed and synthesized as previously described (3) and split into two pools of 24. Two 24-plex PCRs were assembled for each sample in 96-well plates and consisted of 50 nM forward primers, 50 nM reverse primers, approximately 5 ng MDA product, and 2x SsoFast EvaGreen PCR mix (Bio-Rad). Reactions were cycled on a Chromo 4 thermocycler (Bio-Rad) with cycling conditions of 98°C for 3 min, followed by 18 cycles of [98°C for 15 sec, 60°C for 4 min, 72°C for 30 sec] and the two 24-plexes were combined.

The multiplex product for each sample was used as template for 48 single-plex PCRs which were carried out using 48.48 Access Array integrated fluidic circuits according to the manufacturer’s recommended protocol (Fluidigm). Amplicon sequencing libraries were generated as previously described (3) and sequenced using a MiSeq according to the manufacturer’s protocol (Illumina).

Reads were trimmed of adaptor and barcode sequences by Illumina software and aligned to the GRCh37-lite reference genome using Bowtie 2. A binomial exact test was used to call the presence or absence of an allele at each locus covered by at least 50 reads, as previously described (4). Only the 39 target positions consistently called as heterozygous in the bulk DNA sample were considered for the single-cell samples. Allele dropout for these positions was calculated using the formula:

$$1 - \left( \frac{\text{homozygous calls} + 2 \times \text{heterozygous calls}}{\text{heterozygous calls in bulk}} \right)$$

### **Calculation of SNV false and true positive rates**

SNV discovery performance was evaluated for the G1-phase 184-hTERT single-cell droplet MDA sample with the median SD in reads per 1 MB-bin of the 10 G1-phase single cell samples sequenced to low depth. The WGS library for this single-cell sample was whole genome sequenced to approximately 48x depth and compared with a previously sequenced bulk genomic DNA sample sequenced to the same depth as follows. SNV sites from the

dbSNP database were first screened for sites at which the bulk sample had a coverage depth of at least 50 reads where all reads either matched the reference (referred to here as “reference-matching sites”) or all reads did not match the reference (referred to here as “non-reference-matching sites”). The mutationSeq software tool (5) was then used to determine mismatches between the single cell and reference (SNVs) at both reference-matching and non-reference-matching sites for various minimum thresholds of coverage depth in the single cell and various minimum SNV-calling probabilities in the mutationSeq tool. The false positive rate (FPR) was then defined as the number of SNVs identified in the single cell at reference-matching sites having a specified minimum single-cell coverage depth divided by the total number of reference-matching sites having the specified minimum single-cell coverage depth (i.e. the rate of identifying SNVs in the single cell that were not identified in the bulk sample). The true positive rate (TPR) was defined as the number of SNVs identified in the single cell at non-reference-matching sites having a specified minimum single-cell coverage depth divided by the total number of non-reference-matching sites having the specified minimum single-cell coverage depth (i.e. the rate of identifying SNVs in the single cell that were also identified in the bulk sample). A table showing output from mutationSeq for the various coverage depth and SNV-calling probabilities used is shown in SI Appendix, Table S7. A plot showing the inverse correlation between FPR and TPR for various parameters is shown in SI Appendix, Fig. S13.

Proximity of SNV false positives to ends of read islands were computed as follows. SNVs were identified as described above using a mutationSeq SNV-calling probability threshold of 0.9 and a minimum single-cell coverage depth of 4. For each SNV site identified as a false positive, the coverage depth of the 101 positions up and downstream of the site in the reference genome was noted. The proximity of each site to the end of a read island was then found by computing the absolute value of the difference between the number of upstream positions with coverage depth  $\geq 1$  and the number of downstream positions with coverage depth  $\geq 1$ . Thus, an SNV site with an absolute difference value of  $x$  is  $(101 - x)$  bases from the end of a read island.

## References

1. Boeva V, *et al.* (2012) Control-FREEC: a tool for assessing copy number and allelic content using next-generation sequencing data.
2. Ha G, *et al.* (2012) Integrative analysis of genome-wide loss of heterozygosity and monoallelic expression at nucleotide resolution reveals disrupted pathways in triple-negative breast cancer. *Genome Research* 22(10):1995-2007.
3. Roth A, *et al.* (2014) PyClone: statistical inference of clonal population structure in cancer. *Nat Meth* 11(4):396-398.
4. Eirew P, *et al.* (2015) Dynamics of genomic clones in breast cancer patient xenografts at single-cell resolution. *Nature* 518(7539):422-426.
5. Ding J, *et al.* (2012) Feature-based classifiers for somatic mutation detection in tumour-normal paired sequencing data. *Bioinformatics* 28(2):167-175.

## Supplementary Figures

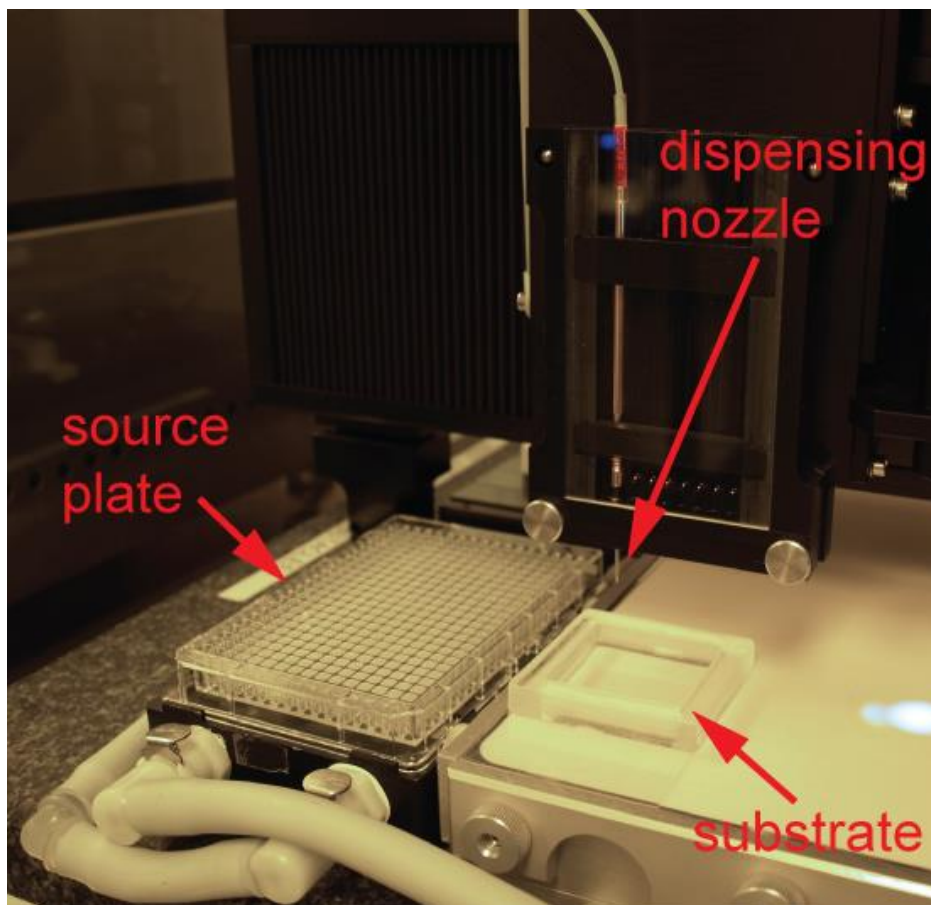

**Fig. S1.** Experimental setup for droplet MDA. Shown is the substrate below the piezoelectric dispensing nozzle with reagent source plate at left.



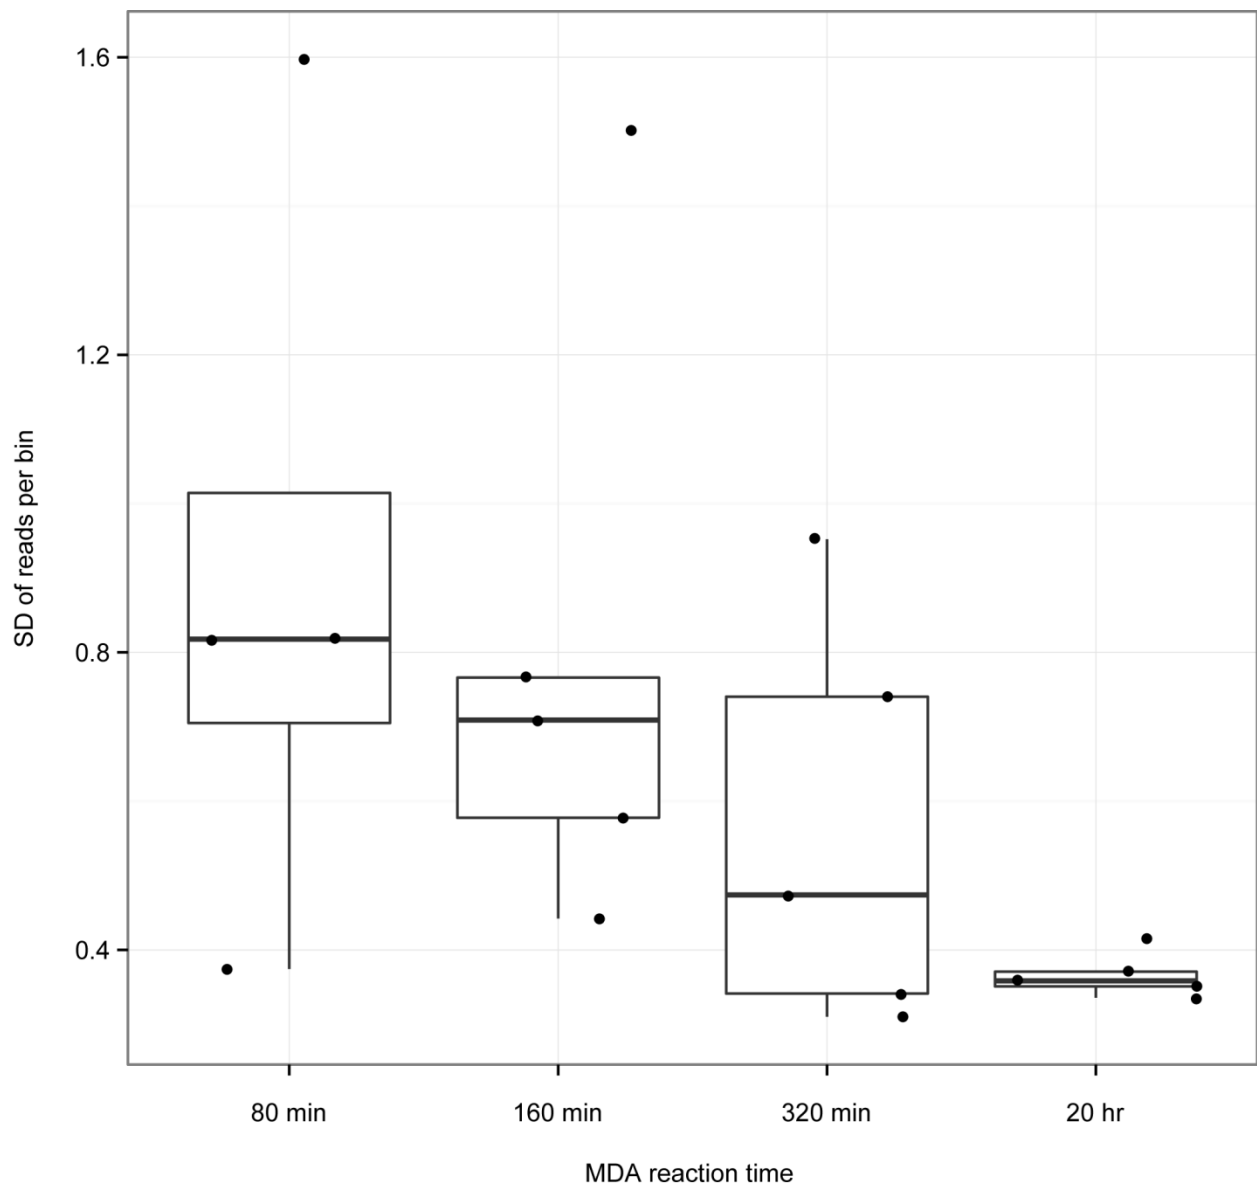

**Fig. S2.** Scatter and box plots of SD in reads per 1-Mb bin for different MDA incubation times. Upper whisker ranges from 75th percentile to sample with largest value within 1.5x interquartile range above 75th percentile, and lower whisker ranges from 25th percentile to sample with smallest value within 1.5x interquartile range below 25th percentile.

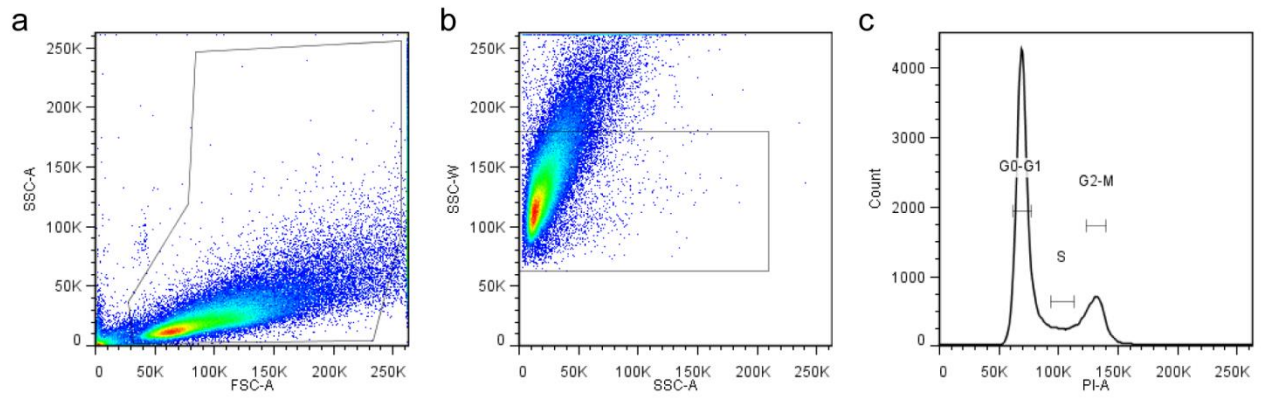

**Fig. S3.** FACS profiles for the gating strategy of 184-hTERT nuclei by DNA content for ploidy analysis. Nuclei were gated to exclude (A) debris and (B) doublets or clumped nuclei. (C) Nuclei in G0/G1, S, and G2/M phases were collected by flow sorting using propidium iodide staining.

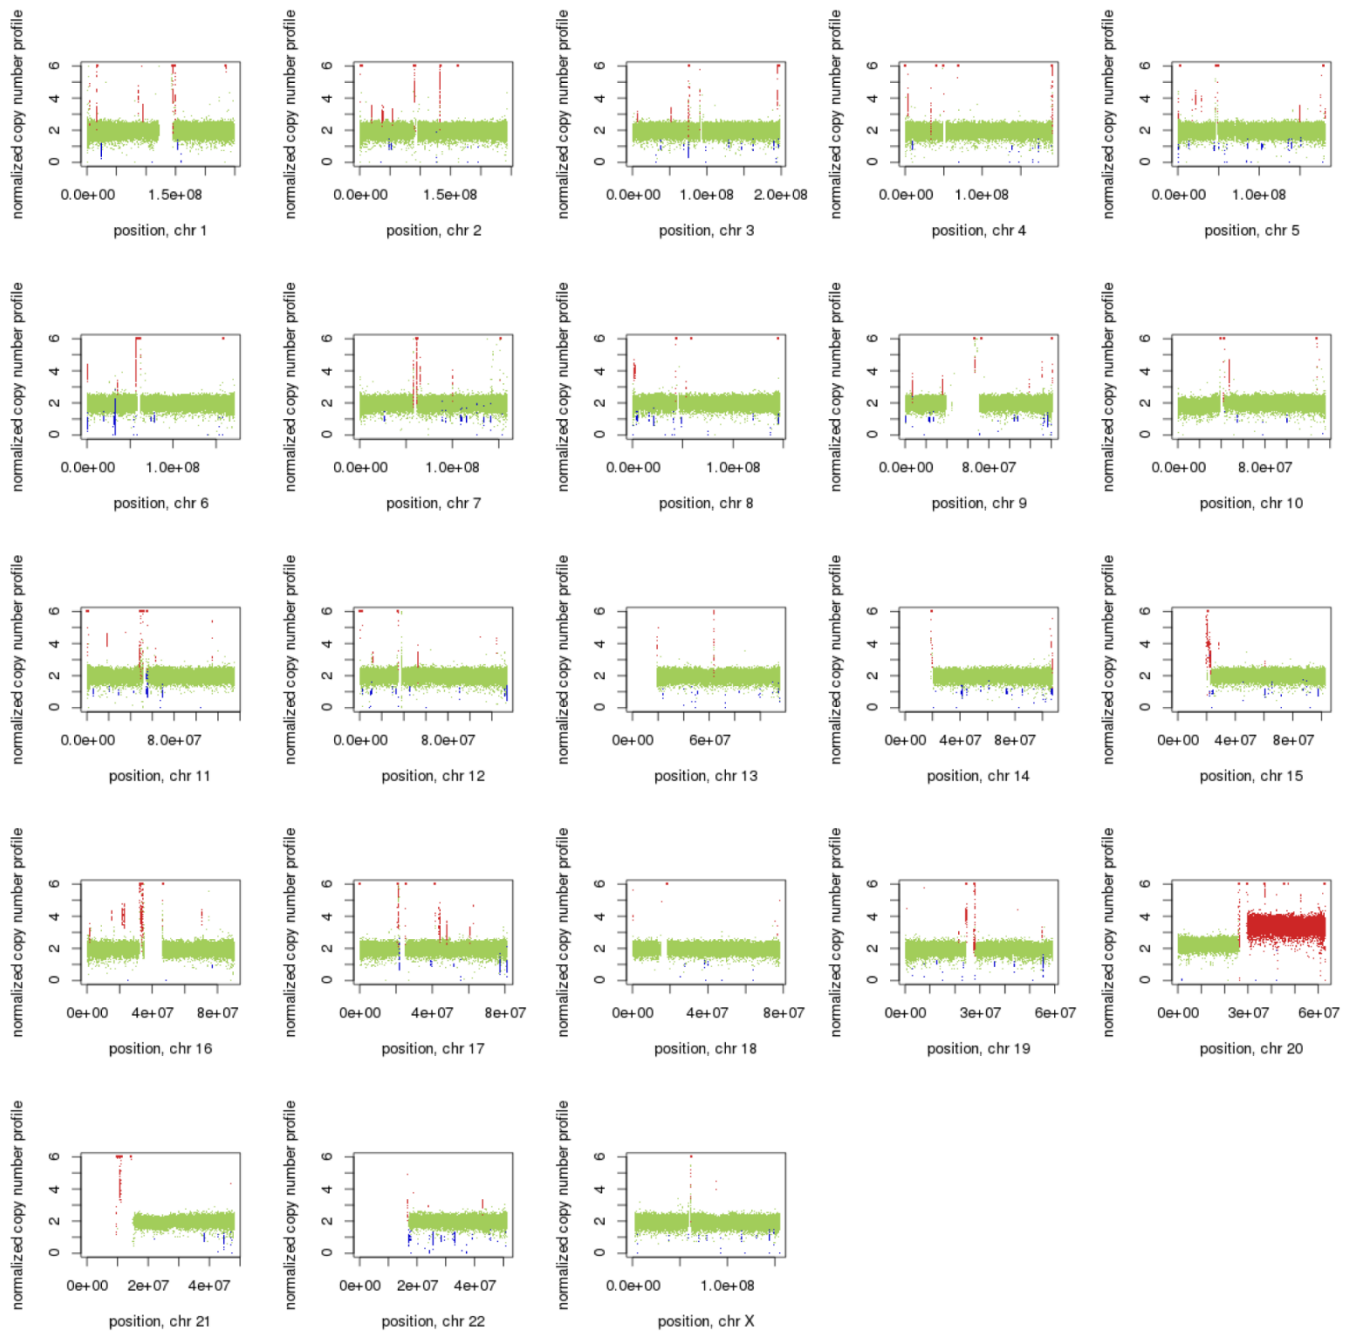

**Fig. S4A.** CNVs identified in 184-hTERT cell line (used in droplet MDA) bulk DNA by Control-FREEC.

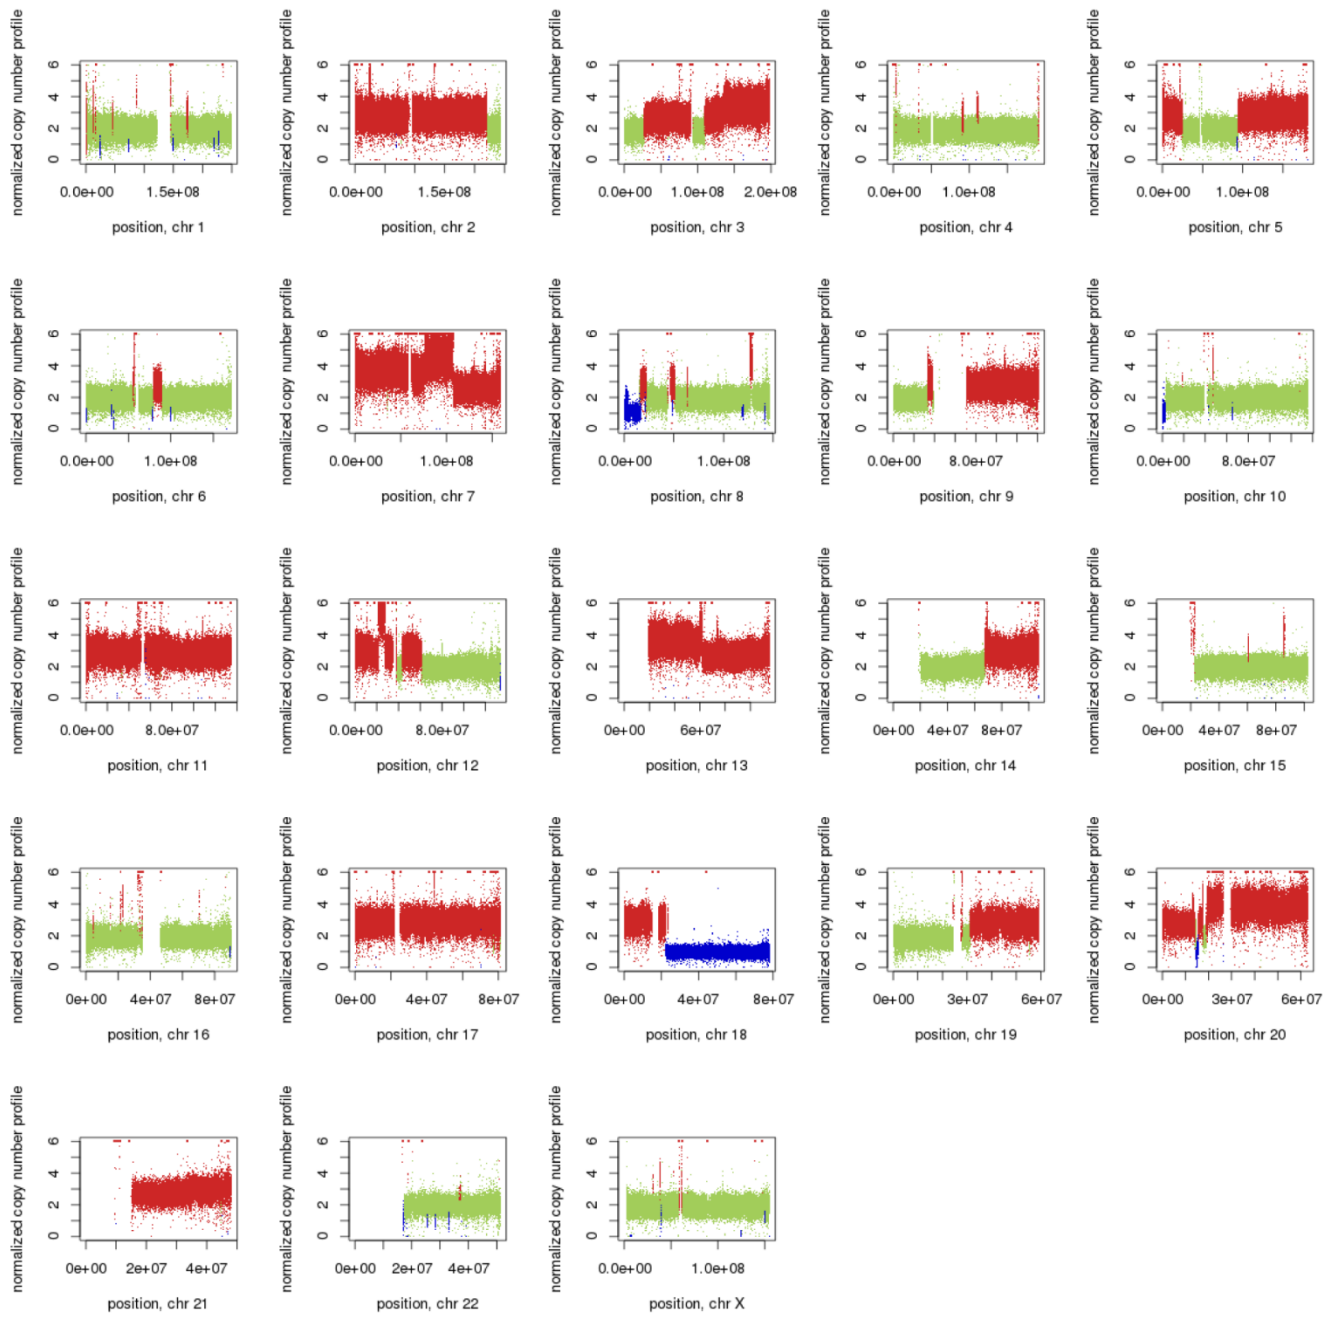

**Fig. S4B.** CNVs identified in SW480 cancer cell line (used in MALBAC) by Control-FREEC.

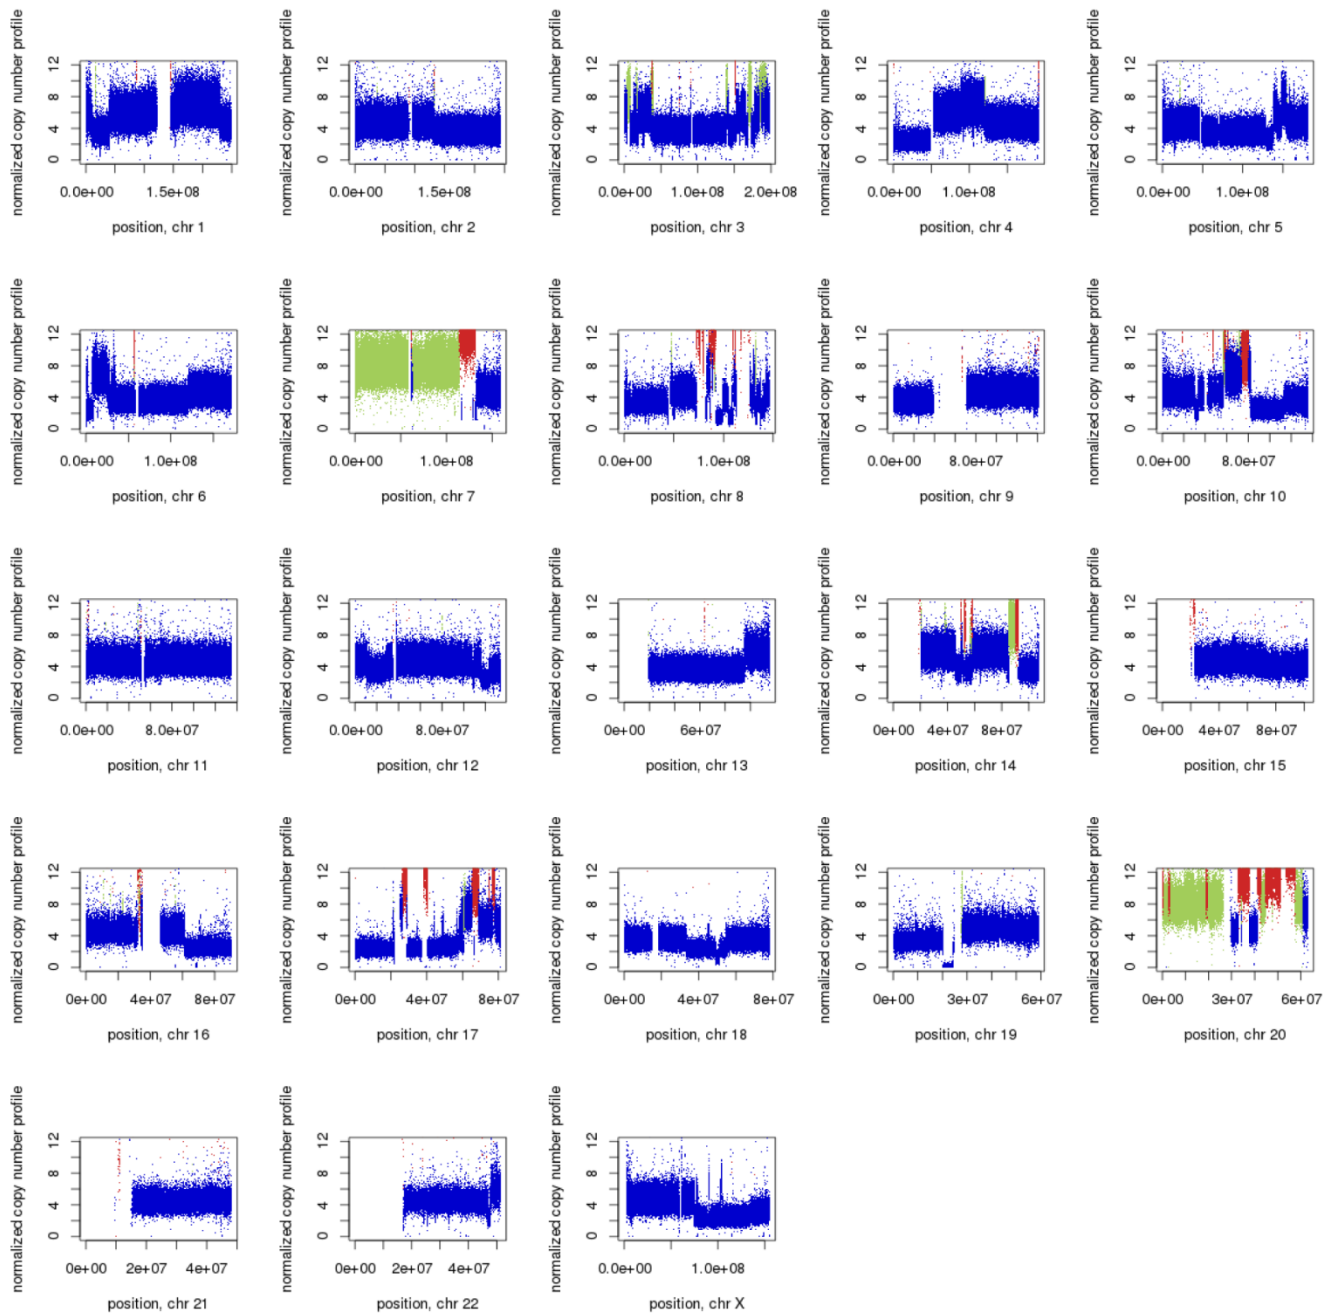

**Fig. S4C.** CNVs identified in SK-BR-3 breast cancer cell line (used in nuc-seq) by Control-FREEC.

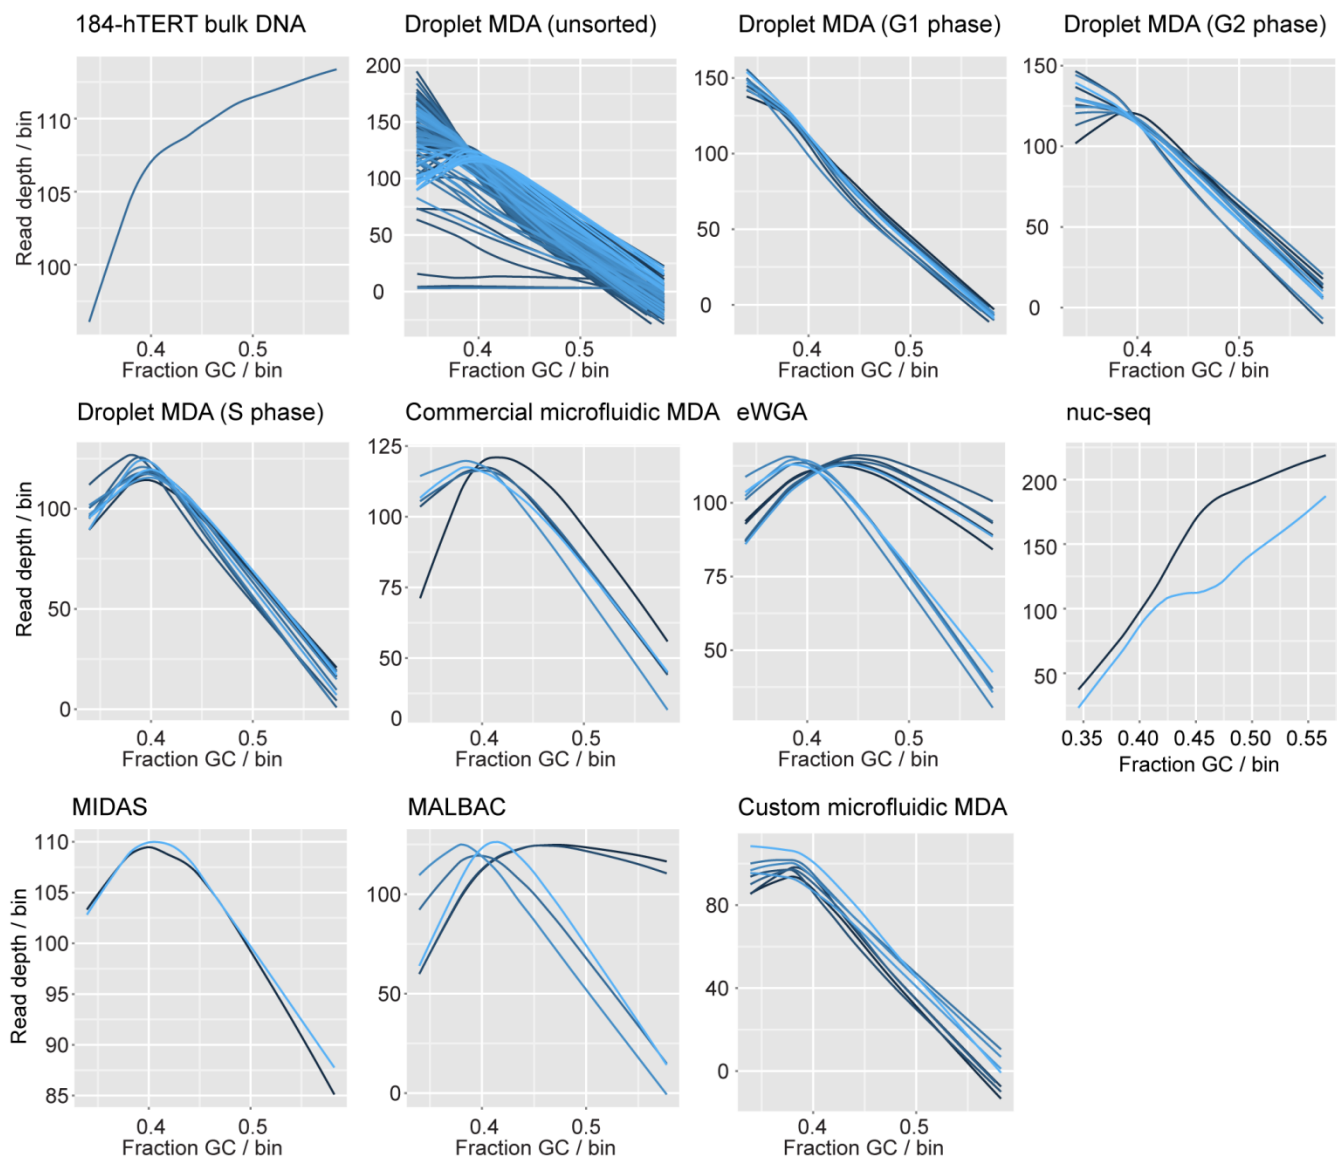

**Fig S5.** LOWESS regressions of read depth per bin vs. GC-content per bin for each sample group prior to correction for GC-content biases. One curve is generated for each sample. All droplet MDA samples were performed on single 184-hTERT cells.

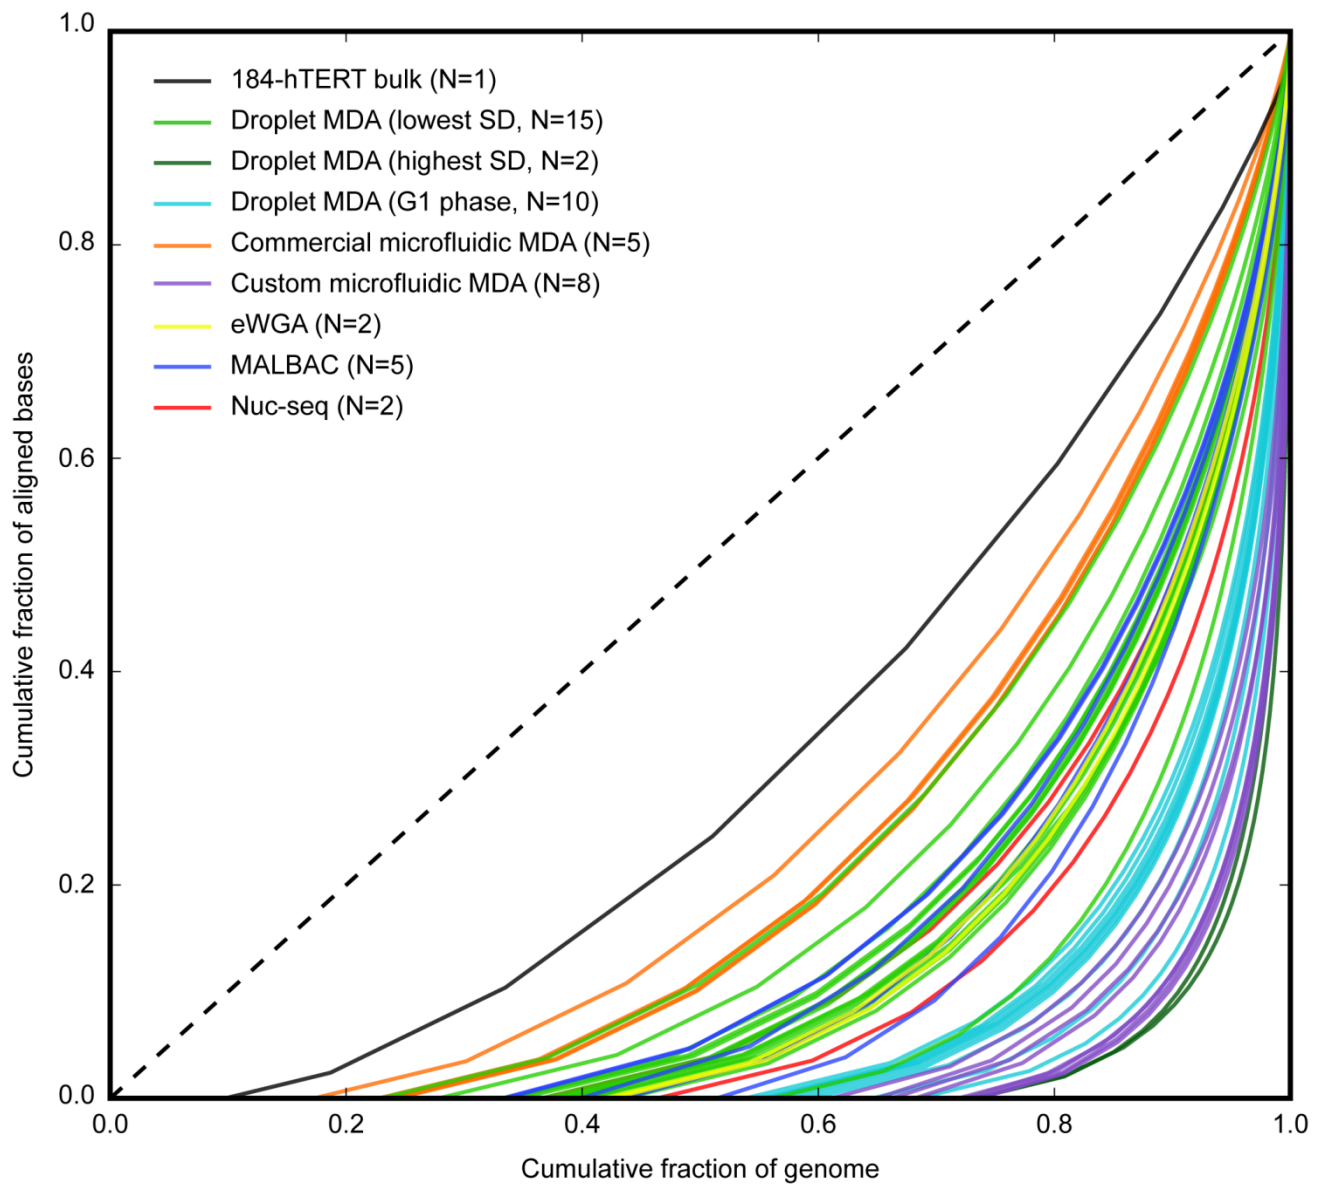

**Fig. S6.** Lorenz curves depicting uniformity of coverage for all samples analyzed from each amplification method.

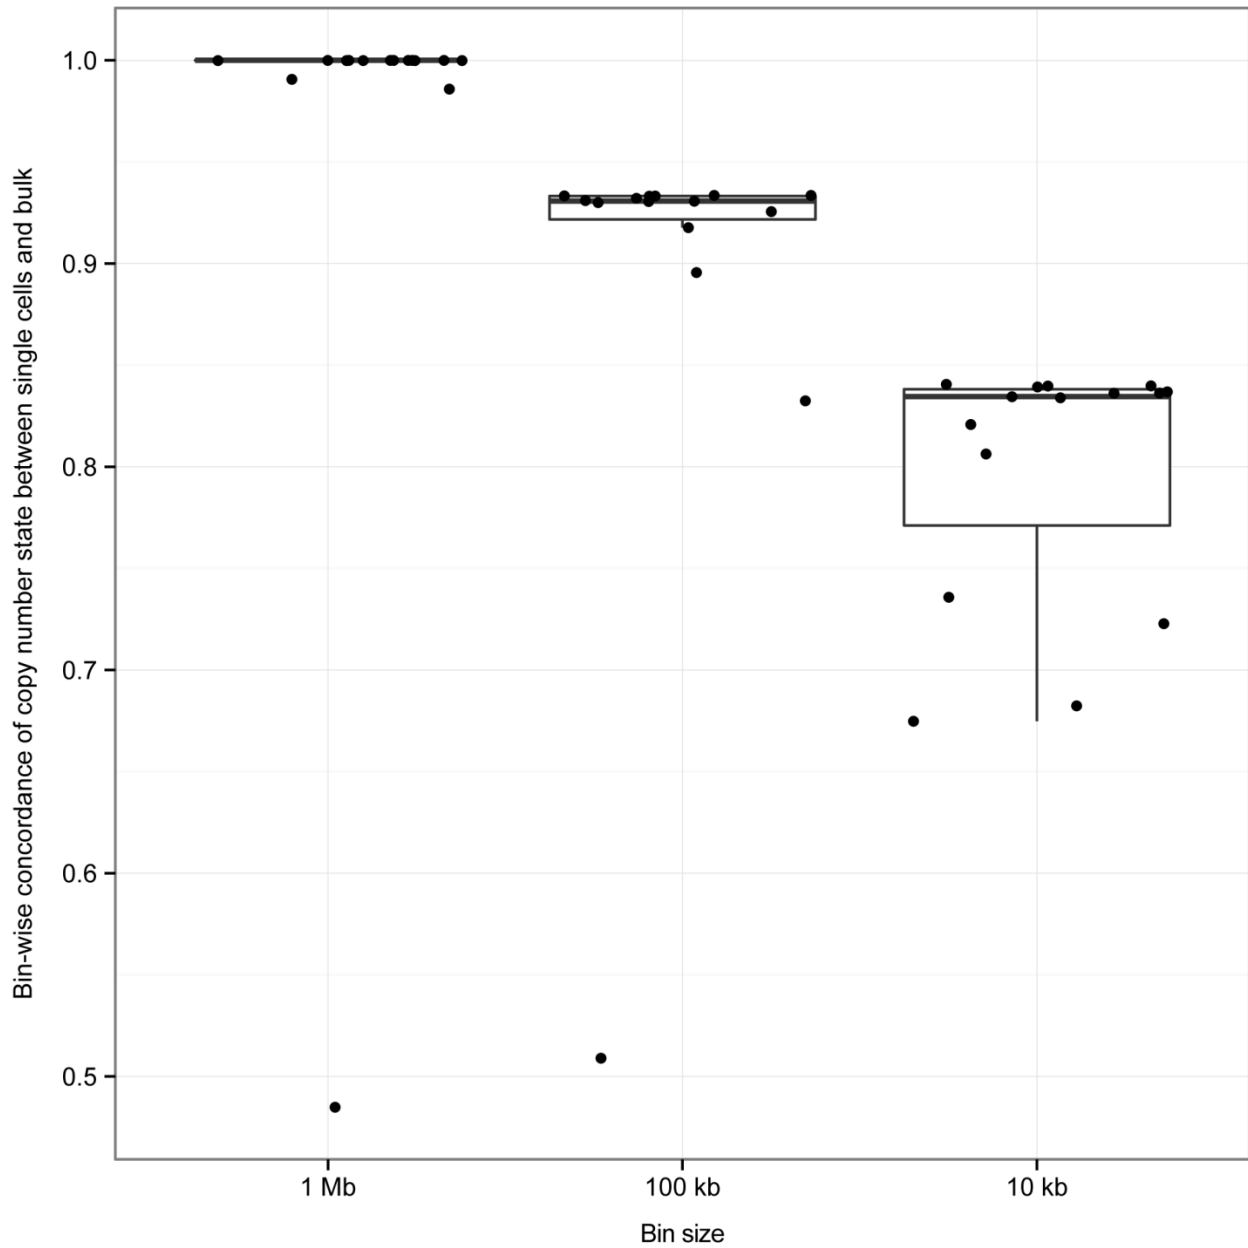

**Fig. S7.** Scatter and box plots of bin-wise concordance of copy number states between 15 184-hTERT single-cell droplet MDA samples sequenced to high depth and bulk DNA for different bin sizes. For 1 Mb, 100 kb, and 10 kb bin sizes, the median concordance rate is 100% (of 2,487 bins), 93.1% (of 24,162 bins), and 83.4% (of 227,172 bins) respectively. Upper whisker ranges from 75th percentile to sample with largest value within 1.5x interquartile range above 75th percentile, and lower whisker ranges from 25th percentile to sample with smallest value within 1.5x interquartile range below 25th percentile.



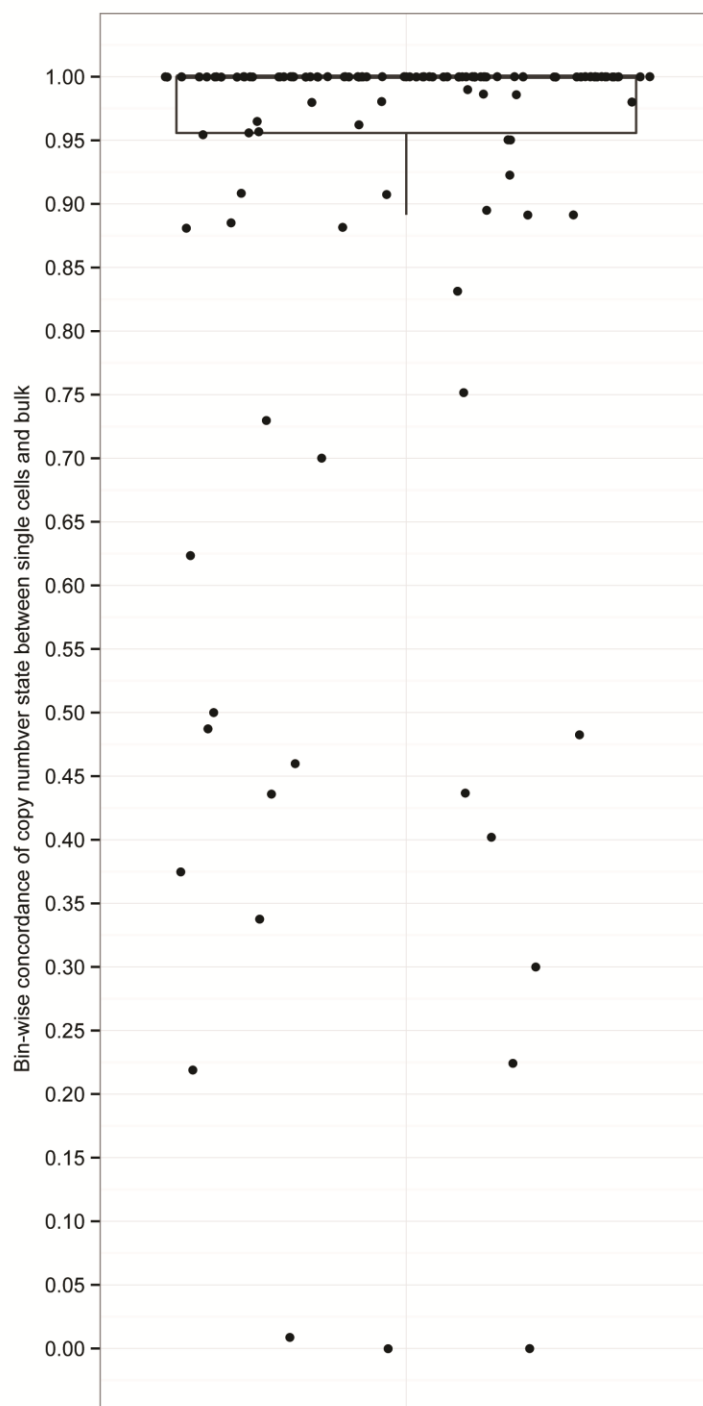

**Fig. S8.** Scatter and box plots of bin-wise concordance of copy number states between each of the 129 184-hTERT single-cell droplet MDA samples and bulk DNA using 1-Mb bins. The median concordance rate is 100% (of 227,172 bins). Upper whisker ranges from 75th percentile to sample with largest value within 1.5 x interquartile range above 75th percentile, and lower whisker ranges from 25th percentile to sample with smallest value within 1.5 x interquartile range below 25th percentile.

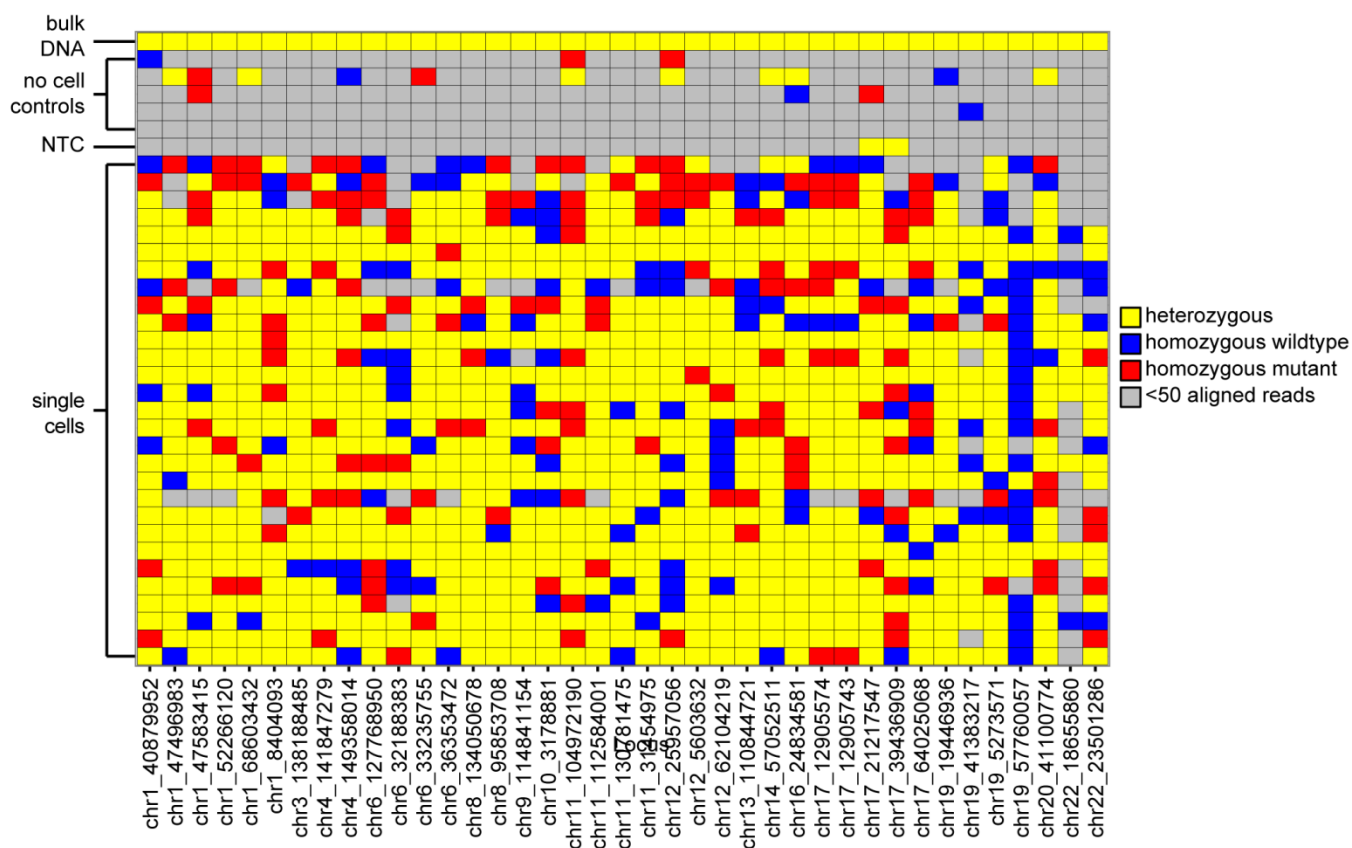

**Fig. S9.** Zygosity at 39 heterozygous loci determined by targeted sequencing of 184-hTERT single-cell droplet MDA samples. Shown are bulk 184-hTERT gDNA, no-cell control reactions (droplet MDA performed on cell suspension fluid but no cells), NTC (no-template control - water as template for PCR reaction), and 184-hTERT single-cell droplet MDA samples.

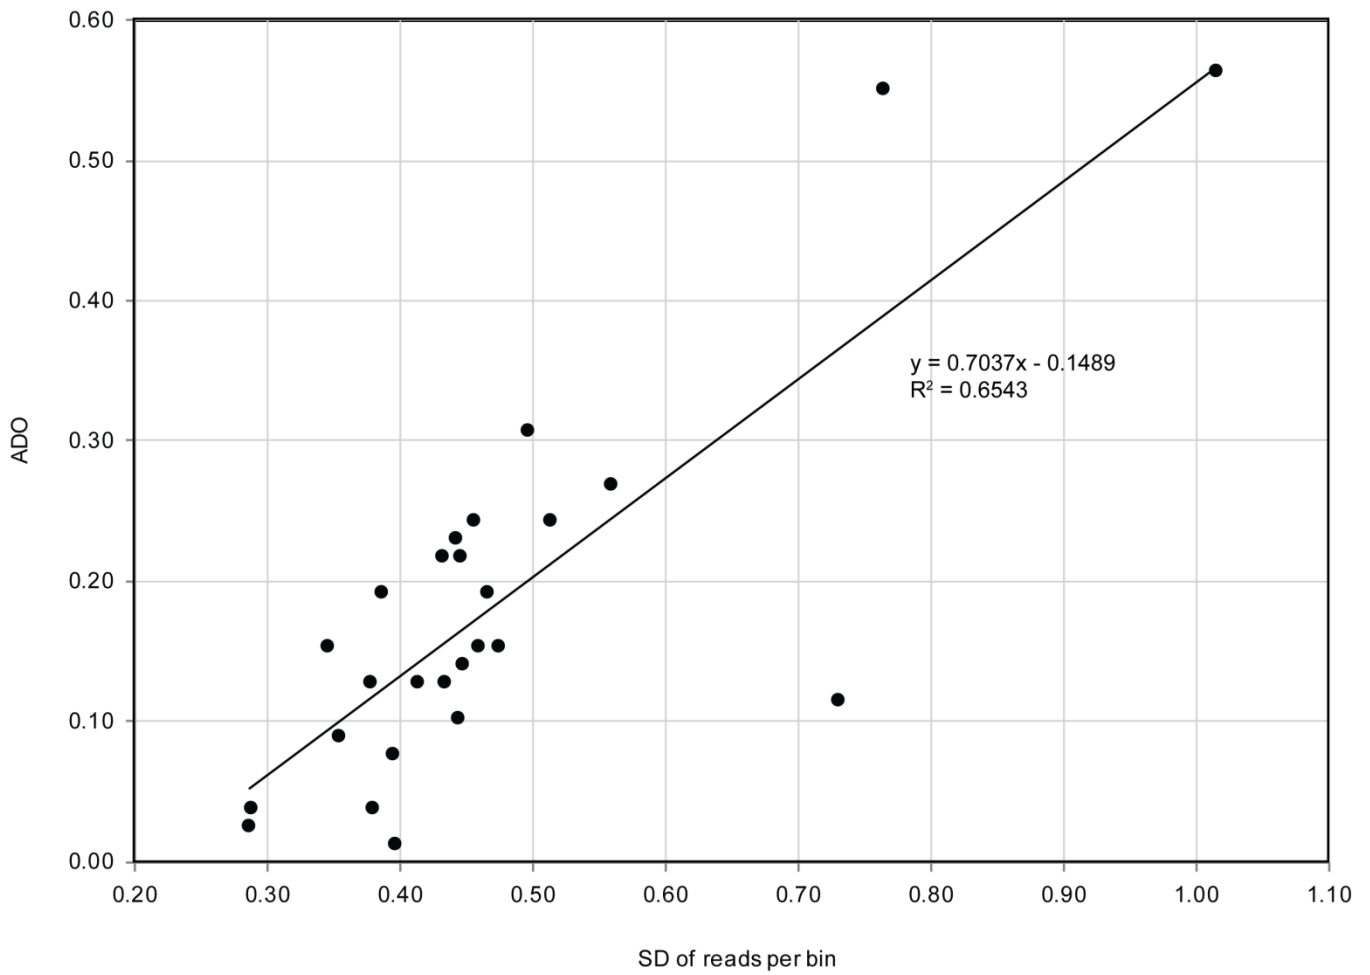

**Fig. S10.** Correlation between SD of reads per 1-Mb bin and allelic dropout (ADO) in 29 184-hTERT single-cell droplet MDA samples. Three outliers are not shown.

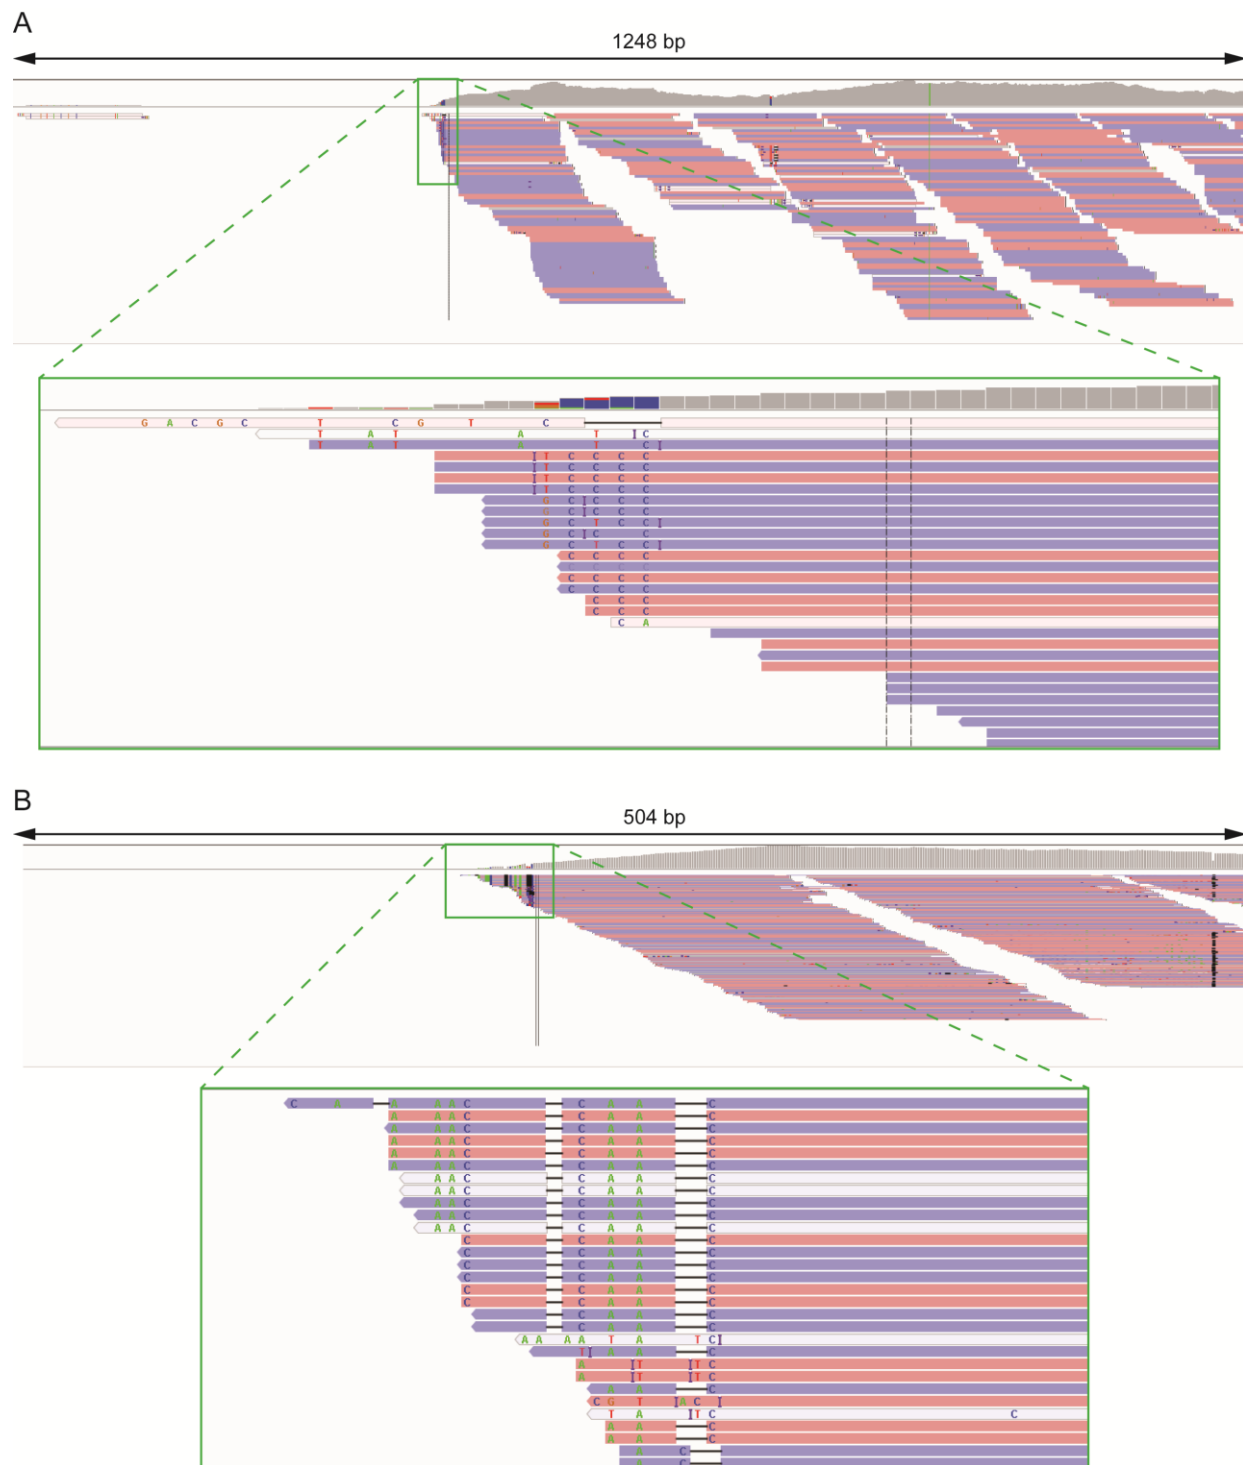

**Fig. S11.** Two representative IGV plots of the deeply sequenced G1-phase single-cell droplet MDA sample showing SNV false positives clustered at the ends of read islands. Mismatches between the single cell and the reference are indicated by displaying the differing base on the read (colours denote different nucleotides). All mismatches shown are not mismatches between the bulk sample and reference and are thus called as false positives. Reads are coloured by pair status where the first and second reads in a pair are shown in blue and red respectively. White reads indicate a mapping quality close to 0.

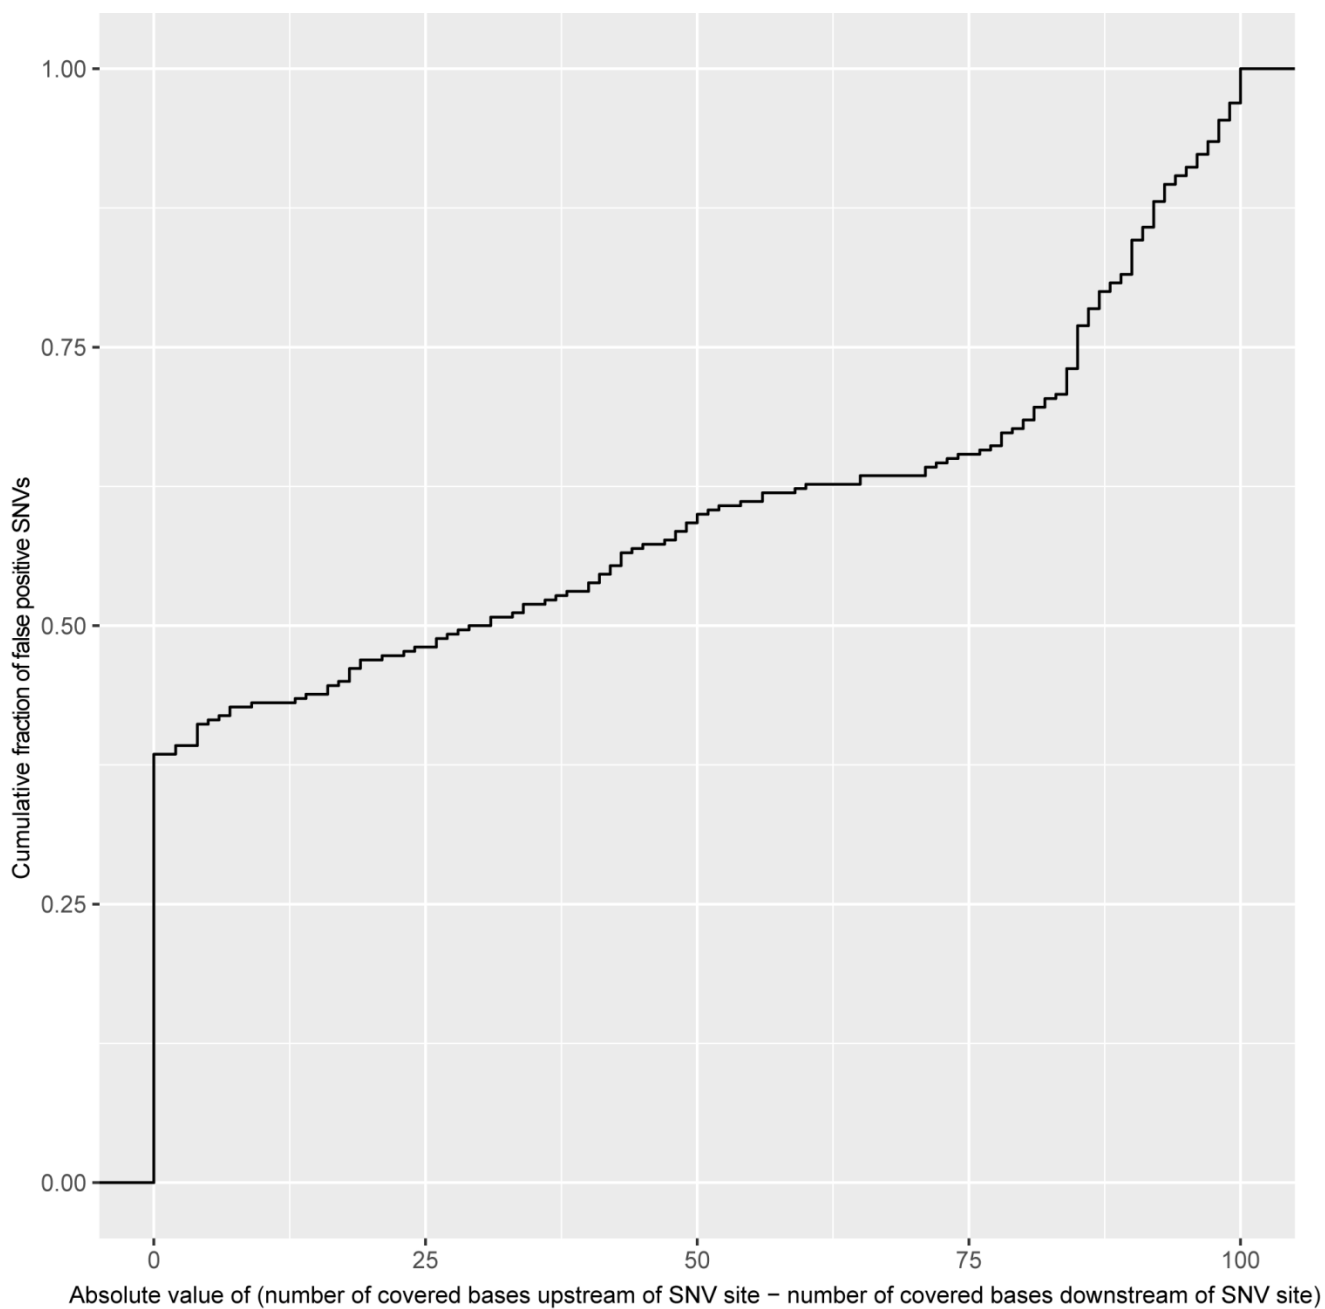

**Fig. S12.** Proximity of SNV false positives to ends of read islands for SNV false positives identified using a mutationSeq SNV-calling probability threshold of 0.9 and a minimum single-cell coverage depth of 4. For each SNV false positive site, the distance from the end of a read island was computed as described in SI Appendix. The plot shows that over 50% of false positive SNVs are within 75 bases of a read island end.

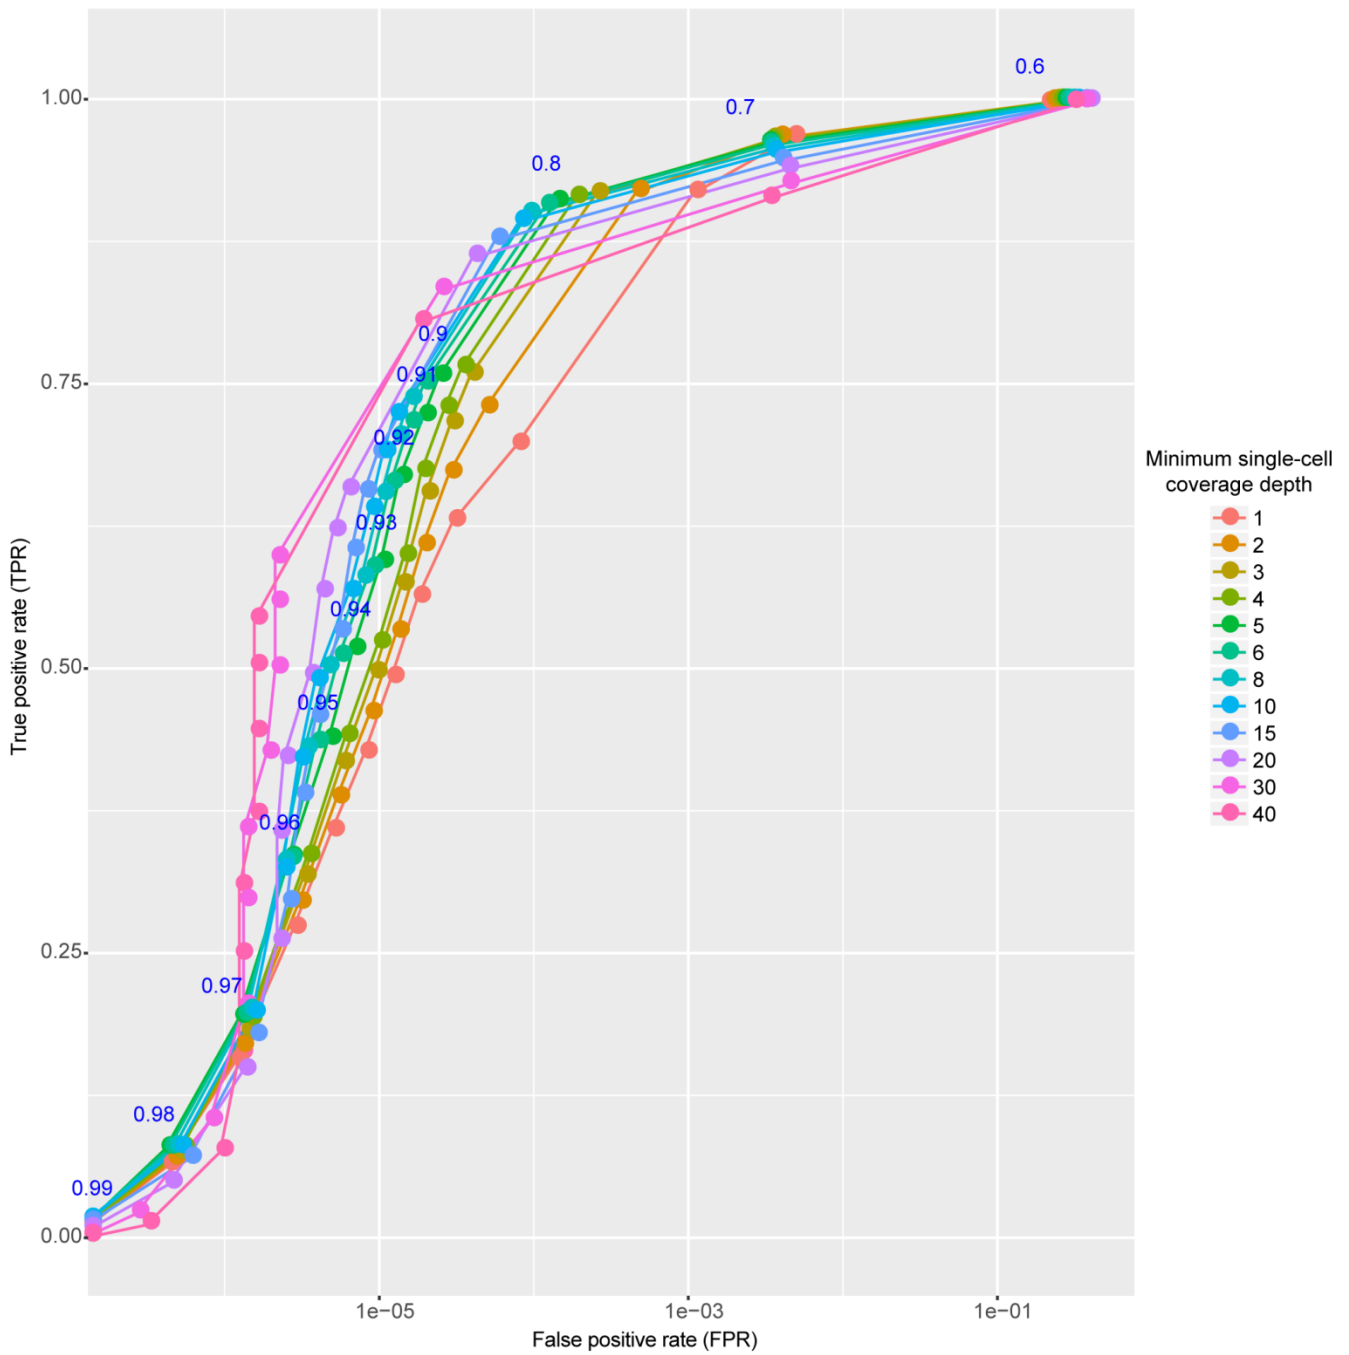

**Fig. S13.** Relationship between SNV true (TPR) and false (FPR) positive rates for different minimum single-cell coverage depth thresholds (indicated by line color) and mutationSeq SNV-calling probability thresholds (indicated by numbers in blue font). TPR and FPR display an inverse correlation.

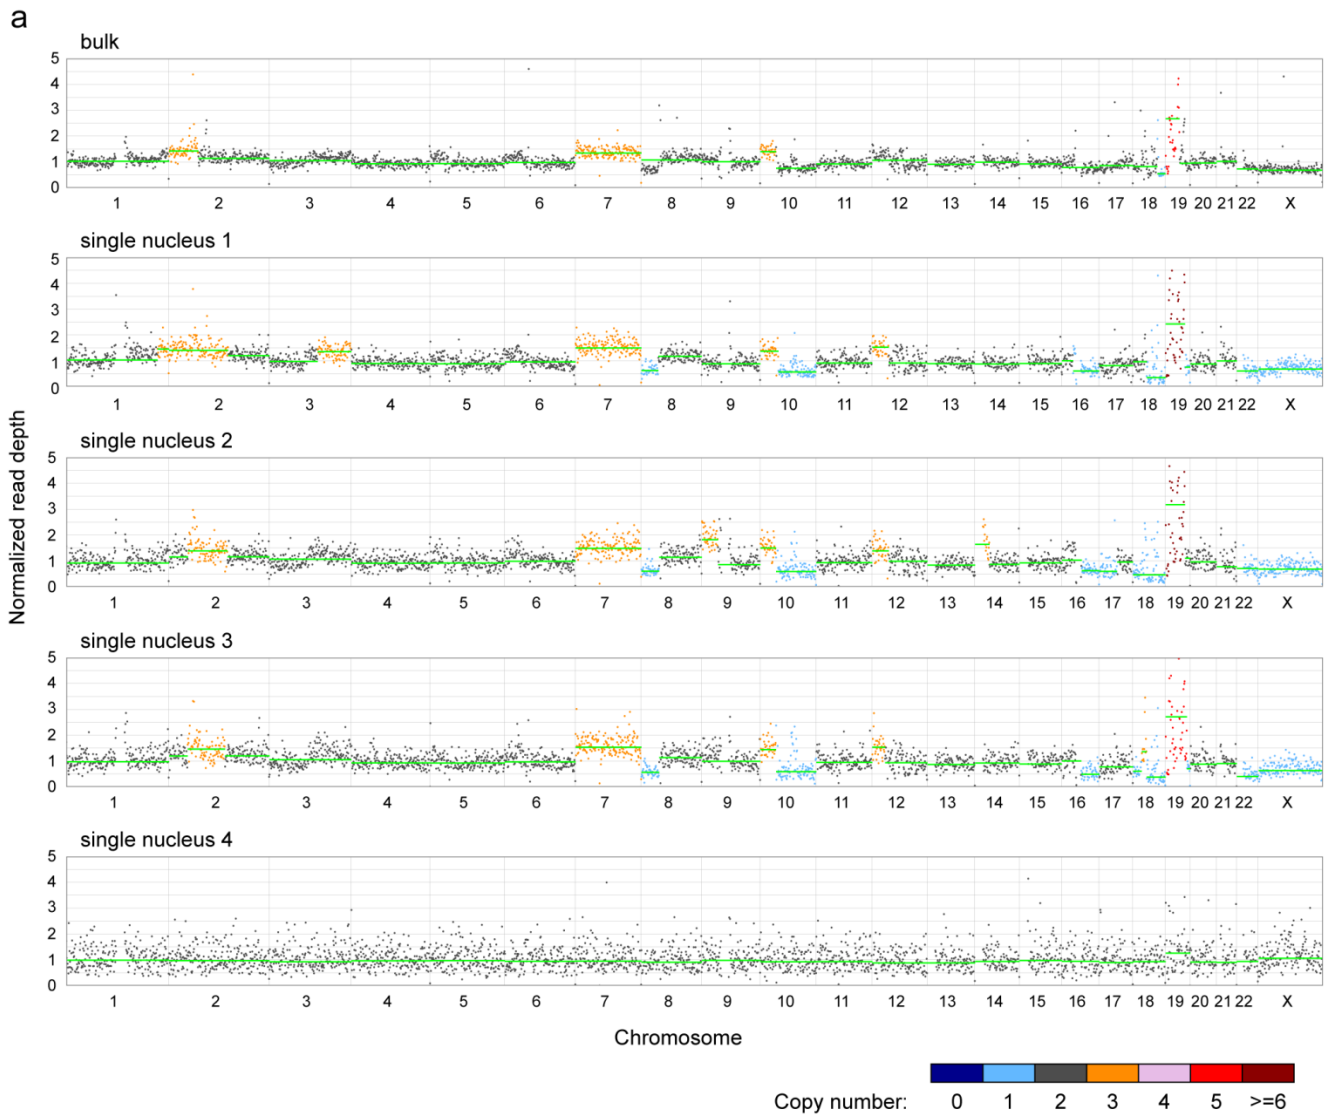

**Fig. S14A.** Normalized read depth using 1-Mb bins for bulk DNA and 4 single-nuclei samples from a high-grade serous ovarian cancer specimen 1. Horizontal green lines indicate segments of contiguous bins inferred to have the same copy number, where the read depth of each segment is equal to the median read depth of the bins in that segment. Inferred copy numbers are indicated by the color of the datapoint for each bin (see legend). Read depth profiles from nuclei 1-3 closely match that of bulk DNA. Nucleus 4 appears to be normal diploid.

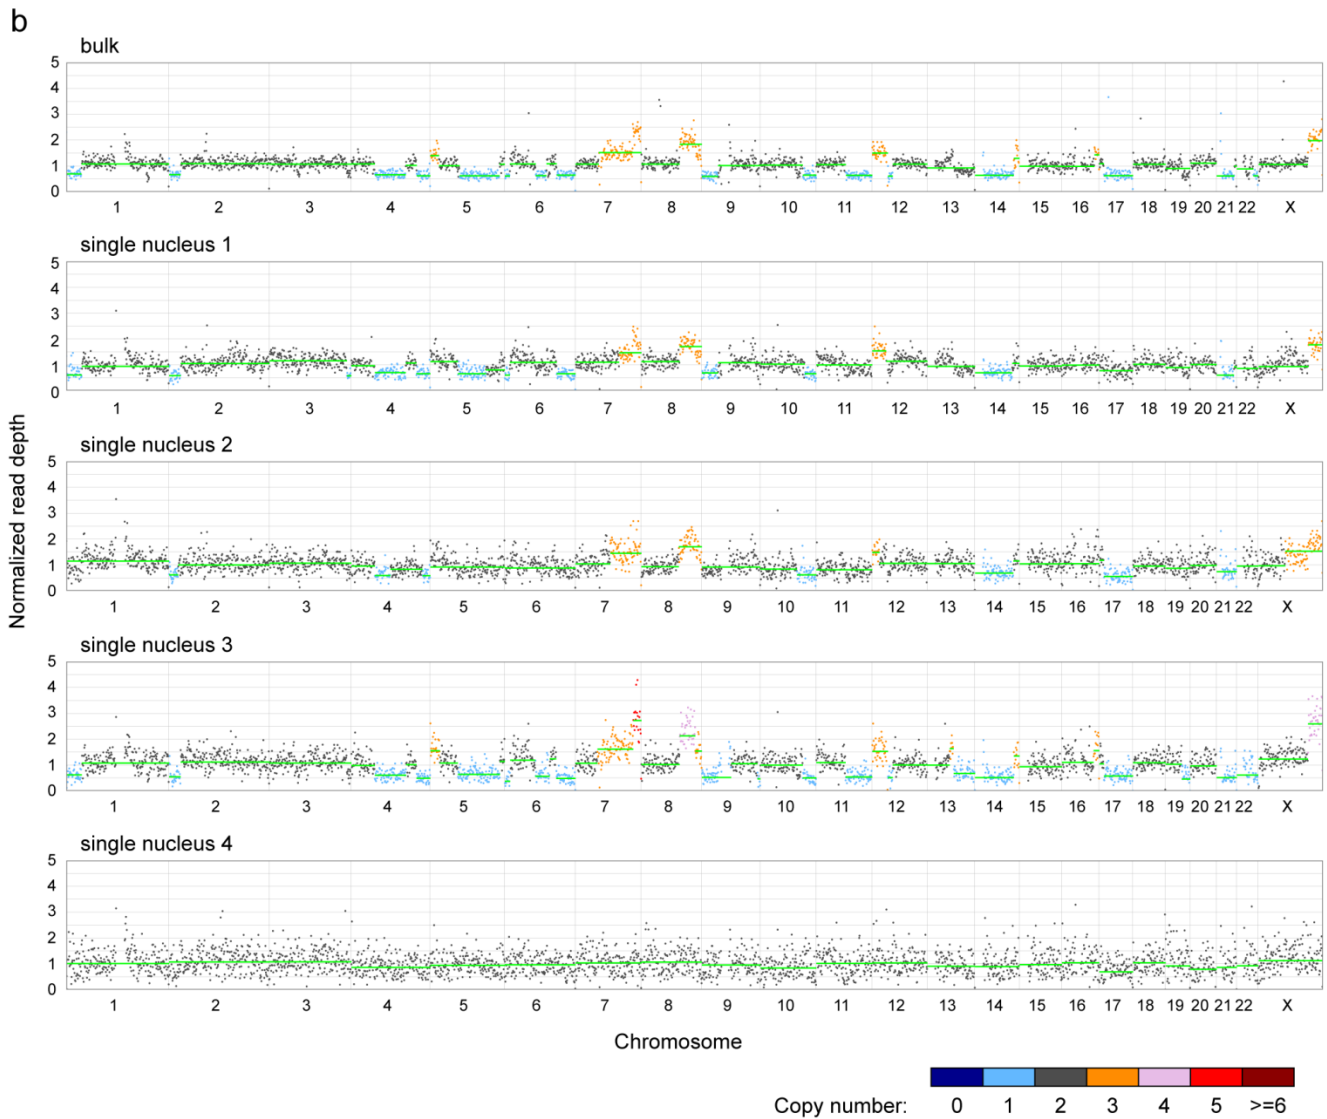

**Fig. S14B.** Normalized read depth using 1-Mb bins for bulk DNA and 4 single-nuclei samples from a high-grade serous ovarian cancer specimen 2. Horizontal green lines indicate segments of contiguous bins inferred to have the same copy number, where the read depth of each segment is equal to the median read depth of the bins in that segment. Inferred copy numbers are indicated by the color of the datapoint for each bin (see legend). Read depth profiles from nuclei 1-3 closely match that of bulk DNA. Nucleus 4 appears to be normal diploid.



## **Supplementary Tables**

**Table S1.** Yields (mean  $\pm$  SD) of different droplet MDA reaction times performed on single 184-hTERT cells

| <b>MDA reaction time</b> | <b>Yield (ng)</b>       |
|--------------------------|-------------------------|
| 80 min                   | 5.21 $\pm$ 2.88 (n=4)   |
| 160 min                  | 44.35 $\pm$ 10.19 (n=4) |
| 320 min                  | 69 $\pm$ 5.7 (n=5)      |
| 20 hrs                   | 68.16 $\pm$ 3.57 (n=5)  |

**Table S2.** Chromosomes considered in each cell type for analysis of bias.

| <b>Cell type</b>                             | <b>Chromosomes considered</b>                              |
|----------------------------------------------|------------------------------------------------------------|
| 184-hTERT (droplet MDA)                      | 1,2,3,4,5,6,7,8,9,10,11,12,13,14,15,16,17,18,19,21,22,X    |
| SW480 (MALBAC)                               | 1,4,10,15,16,22,X                                          |
| SK-BR-3 (nuc-seq)                            | 9,11,15,21                                                 |
| Sperm (microfluidic MDA)                     | 1,2,3,4,5,6,7,8,9,10,11,12,13,14,15,16,17,18,19,20,21,22   |
| Neuron (MIDAS)                               | 1,2,3,4,5,6,7,8,9,10,11,12,13,14,15,16,17,18,19,20,21,22,X |
| Human umbilical vein endothelial cell (eWGA) | 1,2,3,4,5,6,7,8,9,10,11,12,13,14,15,16,17,18,19,20,21,22   |
| GM12752 (commercial microfluidic MDA)        | 1,2,3,4,5,6,7,8,9,10,11,12,13,14,15,16,17,18,19,20,21,22   |

**Table S3:** Alignment metrics for all samples included in comparison of amplification bias.

Alignment metrics were computed after downsampling all samples to the same approximate number of total sequenced bases.

| Sample group                                          | Sample       | Number of reads | Number of bases | Percent duplicate reads | Percent mapped reads | Coverage breadth (%) |
|-------------------------------------------------------|--------------|-----------------|-----------------|-------------------------|----------------------|----------------------|
| <b>bulk 184-hTERT gDNA</b>                            | S47          | 311696          | 26332294        | 0.111968071             | 97.97976233          | 0.7368               |
| <b>no cell / nucleus droplet MDA</b>                  | S24          | 311632          | 26324262        | 6.639882939             | 96.93901782          | 0.0359               |
|                                                       | G4_S6        | 360200          | 26231462        | 23.86729595             | 97.02054414          | 0.0825               |
|                                                       | G5_S7        | 368958          | 26337526        | 37.01695044             | 97.31134709          | 0.0765               |
|                                                       | run10_11_S19 | 310802          | 26254854        | 0.17663979              | 98.0949286           | 0.7569               |
| <b>Droplet MDA on single unsorted 184-hTERT cells</b> | run10_11_S20 | 310740          | 26250936        | 0.148033726             | 98.00090107          | 0.7676               |
|                                                       | run10_11_S21 | 310992          | 26270858        | 0.102896538             | 98.21281576          | 0.764                |
|                                                       | run10_11_S22 | 311674          | 26329589        | 0.134114491             | 98.20806355          | 0.7653               |
|                                                       | run10_11_S23 | 310762          | 26251138        | 0.176340737             | 97.90514928          | 0.7491               |
|                                                       | run12_S10    | 311844          | 26339248        | 0.093957235             | 98.52522415          | 0.7504               |
|                                                       | run12_S11    | 311390          | 26299992        | 0.143228749             | 98.30309258          | 0.4208               |
|                                                       | run12_S12    | 311580          | 26315239        | 0.10494897              | 98.42223506          | 0.744                |
|                                                       | run12_S13    | 311172          | 26281863        | 0.094802874             | 98.4214518           | 0.7548               |
|                                                       | run12_S14    | 311878          | 26339842        | 0.120880601             | 98.363142            | 0.7421               |
|                                                       | run12_S15    | 311226          | 26286641        | 0.094786425             | 98.44357477          | 0.7583               |
|                                                       | run12_S16    | 312088          | 26359911        | 0.531260414             | 98.17359206          | 0.3204               |
|                                                       | run12_S17    | 311586          | 26317081        | 0.080876548             | 98.32502102          | 0.7458               |
|                                                       | run12_S18    | 310690          | 26242282        | 0.083040973             | 98.43187743          | 0.7487               |
|                                                       | run12_S19    | 310866          | 26255905        | 0.092644419             | 98.50996893          | 0.7597               |
|                                                       | run12_S1     | 311466          | 26306294        | 0.131314493             | 97.28573905          | 0.4824               |
|                                                       | run12_S20    | 310636          | 26239410        | 0.758443967             | 98.35627551          | 0.0846               |
|                                                       | run12_S21    | 311126          | 26279404        | 0.094174065             | 98.49450062          | 0.76                 |
|                                                       | run12_S22    | 310872          | 26257089        | 0.119341723             | 98.45145269          | 0.7625               |
|                                                       | run12_S23    | 312038          | 26355373        | 0.110883931             | 98.50531025          | 0.761                |
|                                                       | run12_S24    | 311354          | 26299132        | 0.123653462             | 98.50363252          | 0.7594               |
|                                                       | run12_S25    | 311134          | 26280875        | 0.101885361             | 98.52475139          | 0.7563               |
|                                                       | run12_S26    | 311944          | 26348394        | 0.086233427             | 98.52633806          | 0.7678               |
|                                                       | run12_S27    | 311310          | 26293899        | 0.097330635             | 98.47226238          | 0.7568               |
|                                                       | run12_S28    | 312078          | 26360058        | 0.099013708             | 98.61348765          | 0.7657               |
|                                                       | run12_S29    | 311996          | 26350502        | 0.081731817             | 98.57402018          | 0.7606               |
|                                                       | run12_S2     | 311340          | 26297755        | 0.086721912             | 97.62735273          | 0.6479               |
|                                                       | run12_S30    | 310956          | 26265582        | 0.069463204             | 98.49946616          | 0.7653               |
|                                                       | run12_S31    | 312046          | 26354819        | 0.094537344             | 98.64122597          | 0.7695               |
|                                                       | run12_S32    | 311276          | 26291155        | 0.093486167             | 98.52446061          | 0.7597               |
|                                                       | run12_S33    | 312410          | 26388532        | 0.062097884             | 98.67609872          | 0.7647               |
|                                                       | run12_S34    | 311766          | 26332390        | 0.098150536             | 98.50560998          | 0.7614               |
|                                                       | run12_S35    | 311222          | 26286827        | 0.103141809             | 98.62863165          | 0.7596               |

|            |        |          |             |             |        |
|------------|--------|----------|-------------|-------------|--------|
| run12_S36  | 311806 | 26337459 | 0.087875153 | 98.61484385 | 0.7644 |
| run12_S37  | 310594 | 26233830 | 0.146493493 | 97.76492785 | 0.7343 |
| run12_S38  | 311418 | 26303576 | 0.083167961 | 97.82960523 | 0.75   |
| run12_S39  | 311348 | 26297852 | 0.086398499 | 97.81209451 | 0.7112 |
| run12_S3   | 311048 | 26272038 | 0.195468224 | 97.99098531 | 0.4671 |
| run12_S40  | 310688 | 26243044 | 0.077891647 | 97.79714698 | 0.7247 |
| run12_S41  | 311298 | 26290050 | 0.103437863 | 97.74910215 | 0.7393 |
| run12_S42  | 312408 | 26387503 | 0.090266574 | 97.97060255 | 0.7526 |
| run12_S43  | 311906 | 26339446 | 0.100030137 | 97.38671266 | 0.7064 |
| run12_S44  | 311896 | 26343110 | 0.086887937 | 97.9470721  | 0.7543 |
| run12_S45  | 310848 | 26253533 | 0.101335701 | 97.91119776 | 0.7407 |
| run12_S46  | 311054 | 26272825 | 0.113485118 | 97.81388441 | 0.7514 |
| run12_S47  | 311066 | 26272806 | 0.089691577 | 97.91716227 | 0.7124 |
| run12_S48  | 310958 | 26264741 | 0.096476051 | 97.92383537 | 0.7534 |
| run12_S49  | 310850 | 26255142 | 0.091362393 | 98.00965096 | 0.7548 |
| run12_S4   | 310802 | 26251475 | 0.132882028 | 98.18083539 | 0.6625 |
| run12_S50  | 310920 | 26260694 | 0.101955487 | 97.77306059 | 0.7439 |
| run12_S5   | 311274 | 26293197 | 0.124649023 | 98.08785829 | 0.6123 |
| run12_S6   | 311598 | 26316612 | 0.112966065 | 98.0089731  | 0.5911 |
| run12_S7   | 311450 | 26301852 | 0.084122652 | 97.88087976 | 0.5779 |
| run12_S8   | 311220 | 26275580 | 0.077437183 | 98.37317653 | 0.7341 |
| run12_S9   | 311144 | 26278443 | 0.809592986 | 98.17544288 | 0.076  |
| run6_7_S10 | 311774 | 26323768 | 0.080827779 | 98.11465998 | 0.7007 |
| run6_7_S11 | 311032 | 26261449 | 0.066874148 | 98.25677101 | 0.6874 |
| run6_7_S12 | 311250 | 26273348 | 0.06875502  | 98.07036145 | 0.6741 |
| run6_7_S13 | 311282 | 26283656 | 0.08513181  | 98.20259443 | 0.7027 |
| run6_7_S14 | 310656 | 26234207 | 0.084659559 | 98.11624433 | 0.6334 |
| run6_7_S15 | 311774 | 26328969 | 0.077620328 | 98.46298922 | 0.7183 |
| run6_7_S16 | 311306 | 26292597 | 0.09315593  | 98.7266548  | 0.7245 |
| run6_7_S17 | 312050 | 26355628 | 0.069219676 | 98.7226406  | 0.7321 |
| run6_7_S18 | 311720 | 26325900 | 0.103618632 | 98.57981522 | 0.7205 |
| run6_7_S19 | 311046 | 26270035 | 0.105129145 | 98.54362377 | 0.7183 |
| run6_7_S20 | 310870 | 26258405 | 0.10132853  | 98.66182005 | 0.726  |
| run6_7_S21 | 311970 | 26346214 | 0.063788185 | 98.49536814 | 0.7162 |
| run6_7_S22 | 310580 | 26225153 | 0.08564621  | 98.59198918 | 0.6943 |
| run6_7_S23 | 311390 | 26291859 | 0.072898937 | 98.57445647 | 0.7059 |
| run6_7_S24 | 311834 | 26329342 | 0.077926076 | 98.58033441 | 0.7125 |
| run6_7_S25 | 310916 | 26262206 | 0.075261485 | 98.71251399 | 0.7514 |
| run6_7_S26 | 310802 | 26253259 | 0.085585035 | 98.48263525 | 0.7345 |
| run6_7_S27 | 311092 | 26277977 | 0.10704229  | 98.65827472 | 0.7507 |
| run6_7_S28 | 311590 | 26319163 | 0.092429154 | 98.62511634 | 0.746  |
| run6_7_S29 | 310778 | 26251768 | 0.092027106 | 98.61798454 | 0.7513 |
| run6_7_S30 | 311108 | 26279852 | 0.084215128 | 98.66734382 | 0.7537 |

|                                                           |                                                           |        |          |             |             |             |
|-----------------------------------------------------------|-----------------------------------------------------------|--------|----------|-------------|-------------|-------------|
|                                                           | run6_7_S31                                                | 310658 | 26240408 | 0.083693322 | 98.51219025 | 0.7429      |
|                                                           | run6_7_S32                                                | 311072 | 26277875 | 0.076831087 | 98.71315965 | 0.7519      |
|                                                           | run6_7_S33                                                | 310856 | 26259406 | 0.09136063  | 98.77210027 | 0.753       |
|                                                           | run6_7_S34                                                | 311528 | 26314314 | 0.138671323 | 97.75782594 | 0.4582      |
|                                                           | run6_7_S35                                                | 311140 | 26277034 | 0.064279745 | 98.06132288 | 0.6272      |
|                                                           | run6_7_S36                                                | 312022 | 26354477 | 0.093583145 | 97.95879778 | 0.6235      |
|                                                           | run6_7_S37                                                | 311412 | 26305971 | 0.083490681 | 98.6069901  | 0.7473      |
|                                                           | run6_7_S38                                                | 311592 | 26320383 | 0.069000488 | 98.61292973 | 0.7559      |
|                                                           | run6_7_S39                                                | 310902 | 26263034 | 0.081376125 | 98.54970377 | 0.7532      |
|                                                           | run6_7_S40                                                | 311616 | 26322816 | 0.091779626 | 98.57549035 | 0.7563      |
|                                                           | run6_7_S41                                                | 311354 | 26300904 | 0.098601592 | 98.75672065 | 0.747       |
|                                                           | run6_7_S42                                                | 311978 | 26351824 | 0.109302579 | 98.58131022 | 0.7489      |
|                                                           | run6_7_S43                                                | 311322 | 26298068 | 0.064884589 | 98.66729624 | 0.7548      |
|                                                           | run6_7_S44                                                | 311536 | 26316076 | 0.070938832 | 98.72952083 | 0.7535      |
|                                                           | run6_7_S45                                                | 311392 | 26303097 | 0.070650498 | 98.62038845 | 0.7471      |
|                                                           | run6_7_S46                                                | 312062 | 26358726 | 0.092609802 | 98.74031442 | 0.7491      |
|                                                           | run6_7_S7                                                 | 311660 | 26321118 | 0.105563755 | 98.161458   | 0.71        |
|                                                           | run6_7_S8                                                 | 311082 | 26268869 | 0.101259475 | 98.03363743 | 0.6688      |
|                                                           | run6_7_S9                                                 | 311874 | 26335936 | 0.095551409 | 98.20568563 | 0.6812      |
| <b>Droplet MDA on single 184-hTERT nuclei in G1 phase</b> | S59                                                       | 312000 | 26356323 | 0.065064103 | 97.56987179 | 0.7384      |
|                                                           | S60                                                       | 311850 | 26341905 | 0.085297419 | 97.77392977 | 0.732       |
|                                                           | S62                                                       | 311402 | 26304229 | 0.083814491 | 96.63907104 | 0.6918      |
|                                                           | S63                                                       | 311554 | 26316930 | 0.082489713 | 97.71628674 | 0.7325      |
|                                                           | S64                                                       | 311930 | 26350540 | 0.101945949 | 96.92911871 | 0.7125      |
|                                                           | S65                                                       | 311114 | 26279703 | 0.067820799 | 97.49738038 | 0.7263      |
|                                                           | S66                                                       | 311366 | 26300966 | 0.137137645 | 96.78802438 | 0.648       |
|                                                           | S67                                                       | 311192 | 26287427 | 0.072623975 | 97.3855369  | 0.73        |
|                                                           | S68                                                       | 311374 | 26301972 | 0.072260369 | 97.45579271 | 0.742       |
|                                                           | S69                                                       | 311672 | 26327740 | 0.069945327 | 97.51469494 | 0.7389      |
| <b>Droplet MDA on single 184-hTERT nuclei in S phase</b>  | S70                                                       | 312348 | 26387255 | 0.069793948 | 97.14517141 | 0.7469      |
|                                                           | S71                                                       | 311740 | 26335844 | 0.059985886 | 96.78353756 | 0.7415      |
|                                                           | S72                                                       | 311818 | 26341793 | 0.059008781 | 97.2400567  | 0.7493      |
|                                                           | S74                                                       | 311576 | 26319040 | 0.076385858 | 97.33130922 | 0.751       |
|                                                           | S75                                                       | 310980 | 26270329 | 0.110618046 | 97.08727249 | 0.7456      |
|                                                           | S76                                                       | 311194 | 26288317 | 0.062019191 | 97.17346735 | 0.7429      |
|                                                           | S77                                                       | 310412 | 26221270 | 0.065396956 | 97.08999652 | 0.7334      |
|                                                           | S78                                                       | 310770 | 26253784 | 0.089777006 | 96.8095376  | 0.7538      |
|                                                           | S79                                                       | 310704 | 26244404 | 0.079818734 | 96.90380555 | 0.736       |
|                                                           | S80                                                       | 310780 | 26253172 | 0.058562327 | 97.25111011 | 0.7568      |
|                                                           | S81                                                       | 312016 | 26357343 | 0.080765089 | 97.20847649 | 0.7452      |
|                                                           | <b>Droplet MDA on single 184-hTERT nuclei in G2 phase</b> | S82    | 311822   | 26338443    | 0.081136033 | 97.13618667 |
| S83                                                       |                                                           | 311468 | 26310462 | 0.07095432  | 97.19168582 | 0.7545      |
| S84                                                       |                                                           | 311180 | 26285495 | 0.07326949  | 96.05598046 | 0.7215      |

|                                                        |            |        |          |             |             |        |
|--------------------------------------------------------|------------|--------|----------|-------------|-------------|--------|
|                                                        | S85        | 311938 | 26350291 | 0.064115305 | 97.54758959 | 0.7528 |
|                                                        | S86        | 310922 | 26264778 | 0.055962589 | 96.26851751 | 0.7485 |
|                                                        | S87        | 310728 | 26246833 | 0.095260163 | 97.19593986 | 0.7469 |
|                                                        | S88        | 311408 | 26305210 | 0.070646868 | 97.26949854 | 0.7529 |
|                                                        | S89        | 311678 | 26330701 | 0.088873774 | 97.22887082 | 0.7494 |
|                                                        | S90        | 311272 | 26292506 | 0.105374078 | 97.35536765 | 0.7537 |
|                                                        | S91        | 311234 | 26288674 | 0.077755001 | 97.11888804 | 0.7513 |
|                                                        | S92        | 311554 | 26317737 | 0.100785097 | 96.57170186 | 0.7518 |
|                                                        | S93        | 311352 | 26297965 | 0.073871374 | 96.75158663 | 0.7221 |
|                                                        | S94        | 311564 | 26317999 | 0.084733795 | 96.14043985 | 0.7305 |
| <b>Nuc-seq single cell samples</b>                     | SRX151835  | 262658 | 26265800 | 0.20559054  | 85.34748608 | 0.7095 |
|                                                        | SRX151836  | 263244 | 26324400 | 0.173223321 | 65.96693562 | 0.549  |
| <b>MIDAS single-cell samples</b>                       | SRX316149  | 527284 | 26364200 | 37.09006911 | 87.69543548 | 0.6972 |
|                                                        | SRX316150  | 525435 | 26271750 | 26.90703893 | 92.41028862 | 0.7503 |
| <b>Custom microfluidic MDA single cell samples</b>     | SRX151616  | 264738 | 26209062 | 18.96478783 | 94.16706329 | 0.4818 |
|                                                        | SRX151727  | 264360 | 26171640 | 9.274852474 | 90.68278106 | 0.5194 |
|                                                        | SRX151728  | 265322 | 26266878 | 16.19541538 | 94.7897272  | 0.5267 |
|                                                        | SRX151729  | 265112 | 26246088 | 19.68752829 | 93.85957633 | 0.5264 |
|                                                        | SRX151846  | 253172 | 26299372 | 20.18785648 | 80.14906862 | 0.3839 |
|                                                        | SRX151850  | 254702 | 26300802 | 21.37910185 | 81.93418191 | 0.3942 |
|                                                        | SRX151852  | 251864 | 26233524 | 21.48778706 | 85.37464663 | 0.3935 |
|                                                        | SRX151853  | 253884 | 26224004 | 16.08648044 | 81.77199036 | 0.4361 |
| <b>MALBAC single cell samples</b>                      | SRX202787  | 291290 | 26216100 | 6.813484843 | 84.80311717 | 0.6429 |
|                                                        | SRX202978  | 292504 | 26325360 | 6.779736345 | 85.26174001 | 0.6716 |
|                                                        | SRX204744  | 262628 | 26262800 | 19.3939717  | 93.17094902 | 0.7043 |
|                                                        | SRX204745  | 262786 | 26278600 | 21.81356693 | 91.96342271 | 0.6992 |
|                                                        | SRX205035  | 260934 | 26354334 | 7.946453893 | 58.96855143 | 0.4565 |
| <b>eWGA single cell samples</b>                        | SRS829072  | 261491 | 26410591 | 1.930085548 | 0.842847364 | 0.6885 |
|                                                        | SRS829074  | 261538 | 26415338 | 0.906942777 | 0.860027988 | 0.7011 |
|                                                        | SRS829075  | 259718 | 26231518 | 0.162483925 | 0.881644707 | 0.7069 |
|                                                        | SRS829076  | 260255 | 26285755 | 0.544850243 | 0.870926591 | 0.703  |
|                                                        | SRS829077  | 260704 | 26331104 | 0.18680189  | 0.910411808 | 0.7309 |
|                                                        | SRS829078  | 260351 | 26295451 | 0.142115836 | 0.840891719 | 0.6689 |
|                                                        | SRS829079  | 260028 | 26262828 | 0.2422816   | 0.859368991 | 0.6767 |
|                                                        | SRS829080  | 260892 | 26350092 | 0.289008479 | 0.833360164 | 0.6524 |
|                                                        | SRS829082  | 260402 | 26300602 | 0.95774994  | 0.849713136 | 0.6556 |
|                                                        | SRS829073  | 515697 | 26300547 | 0.60267948  | 0.954380188 | 0.7606 |
| <b>Commercial microfluidic MDA single cell samples</b> | SRR2135902 | 260265 | 26286765 | 0.2893205   | 73.07398229 | 0.6114 |
|                                                        | SRR2135903 | 260098 | 26269898 | 0.305654023 | 73.9382848  | 0.6182 |
|                                                        | SRR2135904 | 260731 | 26333831 | 0.28266681  | 74.95656443 | 0.6287 |
|                                                        | SRR2135905 | 260245 | 26284745 | 0.273972603 | 67.28621107 | 0.5622 |
|                                                        | SRR2135906 | 260297 | 26289997 | 0.32501335  | 75.47224901 | 0.6314 |

**Table S4.** Standard deviation (SD) in reads per 1 MB bin of each sample compared

The read depth plots (1-Mb bin size, mean of 100 reads/bin) in PDF format for each sample are available at <http://www.msl.ubc.ca/sites/default/files/pdata/kaston-leung/Leung-et-al-supplementary-dataset-1.zip>. Filenames correspond to sample names below. Droplet MDA samples using FACS-sorted 184-hTERT cells have the cell phase followed by the word “phase” in the sample name.

| Sample group                | Sample name                             | SD       |
|-----------------------------|-----------------------------------------|----------|
| Commercial microfluidic MDA | SRR2135904_dups_marked_HMMcopy_output   | 0.197029 |
| Commercial microfluidic MDA | SRR2135905_dups_marked_HMMcopy_output   | 0.280707 |
| Commercial microfluidic MDA | SRR2135906_dups_marked_HMMcopy_output   | 0.315723 |
| Commercial microfluidic MDA | SRR2135902_dups_marked_HMMcopy_output   | 0.319212 |
| Commercial microfluidic MDA | SRR2135903_dups_marked_HMMcopy_output   | 0.32958  |
| eWGA                        | HU_eWGA02_dups_marked_HMMcopy_output    | 0.136329 |
| eWGA                        | HU_eWGA01_dups_marked_HMMcopy_output    | 0.141469 |
| eWGA                        | HU_eWGA03_dups_marked_HMMcopy_output    | 0.151841 |
| eWGA                        | HU_eWGA04_dups_marked_HMMcopy_output    | 0.15881  |
| eWGA                        | HU_eWGA10_dups_marked_HMMcopy_output    | 0.158951 |
| eWGA                        | HU_eWGA05_dups_marked_HMMcopy_output    | 0.163036 |
| eWGA                        | HU_eWGA07_dups_marked_HMMcopy_output    | 0.168824 |
| eWGA                        | HU_eWGA09_dups_marked_HMMcopy_output    | 0.175103 |
| eWGA                        | HU_eWGA08_dups_marked_HMMcopy_output    | 0.181379 |
| eWGA                        | HU_eWGA06_dups_marked_HMMcopy_output    | 0.186964 |
| droplet MDA                 | run6_7_S25_dups_marked_HMMcopy_output   | 0.199985 |
| droplet MDA                 | run6_7_S27_dups_marked_HMMcopy_output   | 0.208113 |
| droplet MDA                 | G2_phase_S83_dups_marked_HMMcopy_output | 0.214665 |
| droplet MDA                 | G2_phase_S88_dups_marked_HMMcopy_output | 0.223435 |
| droplet MDA                 | G2_phase_S92_dups_marked_HMMcopy_output | 0.228672 |
| droplet MDA                 | run6_7_S29_dups_marked_HMMcopy_output   | 0.239656 |
| droplet MDA                 | run12_S31_dups_marked_HMMcopy_output    | 0.249223 |
| droplet MDA                 | run6_7_S33_dups_marked_HMMcopy_output   | 0.249419 |
| droplet MDA                 | run6_7_S20_dups_marked_HMMcopy_output   | 0.253358 |
| droplet MDA                 | G2_phase_S91_dups_marked_HMMcopy_output | 0.257745 |
| droplet MDA                 | G2_phase_S89_dups_marked_HMMcopy_output | 0.259306 |
| droplet MDA                 | run12_S44_dups_marked_HMMcopy_output    | 0.263407 |
| droplet MDA                 | run10_11_S20_dups_marked_HMMcopy_output | 0.265229 |
| droplet MDA                 | run6_7_S30_dups_marked_HMMcopy_output   | 0.267807 |
| droplet MDA                 | run12_S30_dups_marked_HMMcopy_output    | 0.270473 |
| droplet MDA                 | G2_phase_S84_dups_marked_HMMcopy_output | 0.274831 |
| droplet MDA                 | run6_7_S32_dups_marked_HMMcopy_output   | 0.276521 |
| droplet MDA                 | run6_7_S17_dups_marked_HMMcopy_output   | 0.276877 |
| droplet MDA                 | run10_11_S22_dups_marked_HMMcopy_output | 0.279024 |
| droplet MDA                 | G2_phase_S90_dups_marked_HMMcopy_output | 0.280475 |

|             |                                         |          |
|-------------|-----------------------------------------|----------|
| droplet MDA | run6_7_S40_dups_marked_HMMcopy_output   | 0.282981 |
| droplet MDA | run6_7_S19_dups_marked_HMMcopy_output   | 0.283525 |
| droplet MDA | run10_11_S21_dups_marked_HMMcopy_output | 0.285037 |
| droplet MDA | G2_phase_S94_dups_marked_HMMcopy_output | 0.289073 |
| droplet MDA | G2_phase_S82_dups_marked_HMMcopy_output | 0.292599 |
| droplet MDA | G2_phase_S86_dups_marked_HMMcopy_output | 0.295147 |
| droplet MDA | run12_S46_dups_marked_HMMcopy_output    | 0.295243 |
| droplet MDA | run12_S28_dups_marked_HMMcopy_output    | 0.296028 |
| droplet MDA | run6_7_S39_dups_marked_HMMcopy_output   | 0.296851 |
| droplet MDA | run6_7_S31_dups_marked_HMMcopy_output   | 0.302624 |
| droplet MDA | G2_phase_S85_dups_marked_HMMcopy_output | 0.303269 |
| droplet MDA | run6_7_S21_dups_marked_HMMcopy_output   | 0.307248 |
| droplet MDA | S_phase_S74_dups_marked_HMMcopy_output  | 0.308415 |
| droplet MDA | run12_S38_dups_marked_HMMcopy_output    | 0.308552 |
| droplet MDA | run6_7_S23_dups_marked_HMMcopy_output   | 0.311338 |
| droplet MDA | run10_11_S19_dups_marked_HMMcopy_output | 0.311761 |
| droplet MDA | G2_phase_S87_dups_marked_HMMcopy_output | 0.311856 |
| droplet MDA | run6_7_S16_dups_marked_HMMcopy_output   | 0.312961 |
| droplet MDA | run6_7_S44_dups_marked_HMMcopy_output   | 0.313487 |
| droplet MDA | run6_7_S43_dups_marked_HMMcopy_output   | 0.31426  |
| droplet MDA | run6_7_S38_dups_marked_HMMcopy_output   | 0.315707 |
| droplet MDA | run12_S48_dups_marked_HMMcopy_output    | 0.318421 |
| droplet MDA | run6_7_S45_dups_marked_HMMcopy_output   | 0.320322 |
| droplet MDA | S_phase_S72_dups_marked_HMMcopy_output  | 0.323834 |
| droplet MDA | run6_7_S46_dups_marked_HMMcopy_output   | 0.330495 |
| droplet MDA | run12_S49_dups_marked_HMMcopy_output    | 0.330521 |
| droplet MDA | G1_phase_S69_dups_marked_HMMcopy_output | 0.337603 |
| droplet MDA | run6_7_S42_dups_marked_HMMcopy_output   | 0.337797 |
| droplet MDA | run12_S34_dups_marked_HMMcopy_output    | 0.338873 |
| droplet MDA | S_phase_S81_dups_marked_HMMcopy_output  | 0.339155 |
| droplet MDA | run12_S35_dups_marked_HMMcopy_output    | 0.339442 |
| droplet MDA | run6_7_S18_dups_marked_HMMcopy_output   | 0.34024  |
| droplet MDA | S_phase_S80_dups_marked_HMMcopy_output  | 0.340468 |
| droplet MDA | G2_phase_S93_dups_marked_HMMcopy_output | 0.343496 |
| droplet MDA | run12_S36_dups_marked_HMMcopy_output    | 0.344307 |
| droplet MDA | S_phase_S76_dups_marked_HMMcopy_output  | 0.345312 |
| droplet MDA | run6_7_S41_dups_marked_HMMcopy_output   | 0.346408 |
| droplet MDA | S_phase_S79_dups_marked_HMMcopy_output  | 0.348022 |
| droplet MDA | S_phase_S75_dups_marked_HMMcopy_output  | 0.348739 |
| droplet MDA | run12_S29_dups_marked_HMMcopy_output    | 0.354658 |
| droplet MDA | run6_7_S15_dups_marked_HMMcopy_output   | 0.362664 |
| droplet MDA | run12_S32_dups_marked_HMMcopy_output    | 0.363184 |
| droplet MDA | run12_S42_dups_marked_HMMcopy_output    | 0.365935 |



|             |                                         |          |
|-------------|-----------------------------------------|----------|
| droplet MDA | run12_S15_dups_marked_HMMcopy_output    | 0.366407 |
| droplet MDA | run12_S22_dups_marked_HMMcopy_output    | 0.366789 |
| droplet MDA | run10_11_S23_dups_marked_HMMcopy_output | 0.36866  |
| droplet MDA | run12_S19_dups_marked_HMMcopy_output    | 0.372992 |
| droplet MDA | S_phase_S78_dups_marked_HMMcopy_output  | 0.375068 |
| droplet MDA | run12_S33_dups_marked_HMMcopy_output    | 0.378104 |
| droplet MDA | G1_phase_S59_dups_marked_HMMcopy_output | 0.381883 |
| droplet MDA | run6_7_S24_dups_marked_HMMcopy_output   | 0.382281 |
| droplet MDA | G1_phase_S63_dups_marked_HMMcopy_output | 0.383074 |
| droplet MDA | G1_phase_S68_dups_marked_HMMcopy_output | 0.384254 |
| droplet MDA | run6_7_S11_dups_marked_HMMcopy_output   | 0.387841 |
| droplet MDA | run6_7_S26_dups_marked_HMMcopy_output   | 0.388665 |
| droplet MDA | run12_S26_dups_marked_HMMcopy_output    | 0.392207 |
| droplet MDA | S_phase_S77_dups_marked_HMMcopy_output  | 0.3957   |
| droplet MDA | run12_S50_dups_marked_HMMcopy_output    | 0.395716 |
| droplet MDA | G1_phase_S65_dups_marked_HMMcopy_output | 0.397334 |
| droplet MDA | S_phase_S70_dups_marked_HMMcopy_output  | 0.406541 |
| droplet MDA | S_phase_S71_dups_marked_HMMcopy_output  | 0.410918 |
| droplet MDA | G1_phase_S64_dups_marked_HMMcopy_output | 0.411967 |
| droplet MDA | run6_7_S7_dups_marked_HMMcopy_output    | 0.414015 |
| droplet MDA | run12_S37_dups_marked_HMMcopy_output    | 0.414218 |
| droplet MDA | run12_S21_dups_marked_HMMcopy_output    | 0.426286 |
| droplet MDA | G1_phase_S60_dups_marked_HMMcopy_output | 0.427752 |
| droplet MDA | run12_S45_dups_marked_HMMcopy_output    | 0.428024 |
| droplet MDA | run12_S13_dups_marked_HMMcopy_output    | 0.429465 |
| droplet MDA | run6_7_S10_dups_marked_HMMcopy_output   | 0.439764 |
| droplet MDA | run12_S24_dups_marked_HMMcopy_output    | 0.443019 |
| droplet MDA | run12_S23_dups_marked_HMMcopy_output    | 0.446136 |
| droplet MDA | G1_phase_S67_dups_marked_HMMcopy_output | 0.447831 |
| droplet MDA | run12_S27_dups_marked_HMMcopy_output    | 0.46768  |
| droplet MDA | run6_7_S13_dups_marked_HMMcopy_output   | 0.476721 |
| droplet MDA | run12_S41_dups_marked_HMMcopy_output    | 0.495628 |
| droplet MDA | G1_phase_S62_dups_marked_HMMcopy_output | 0.50873  |
| droplet MDA | run12_S8_dups_marked_HMMcopy_output     | 0.509551 |
| droplet MDA | run6_7_S37_dups_marked_HMMcopy_output   | 0.515212 |
| droplet MDA | run12_S25_dups_marked_HMMcopy_output    | 0.533379 |
| droplet MDA | run12_S12_dups_marked_HMMcopy_output    | 0.568361 |
| droplet MDA | run12_S10_dups_marked_HMMcopy_output    | 0.578369 |
| droplet MDA | run6_7_S12_dups_marked_HMMcopy_output   | 0.59036  |
| droplet MDA | run12_S14_dups_marked_HMMcopy_output    | 0.595722 |
| droplet MDA | run12_S40_dups_marked_HMMcopy_output    | 0.610564 |
| droplet MDA | run12_S18_dups_marked_HMMcopy_output    | 0.611944 |
| droplet MDA | run6_7_S28_dups_marked_HMMcopy_output   | 0.61367  |

|                          |                  |                                         |          |
|--------------------------|------------------|-----------------------------------------|----------|
| droplet MDA              |                  | run6_7_S9_dups_marked_HMMcopy_output    | 0.62569  |
| droplet MDA              |                  | run12_S17_dups_marked_HMMcopy_output    | 0.626448 |
| droplet MDA              |                  | run6_7_S8_dups_marked_HMMcopy_output    | 0.627933 |
| droplet MDA              |                  | run6_7_S22_dups_marked_HMMcopy_output   | 0.647547 |
| droplet MDA              |                  | run12_S39_dups_marked_HMMcopy_output    | 0.683476 |
| droplet MDA              |                  | G1_phase_S66_dups_marked_HMMcopy_output | 0.691754 |
| droplet MDA              |                  | run12_S47_dups_marked_HMMcopy_output    | 0.713661 |
| droplet MDA              |                  | run12_S43_dups_marked_HMMcopy_output    | 0.737676 |
| droplet MDA              |                  | run12_S2_dups_marked_HMMcopy_output     | 0.979808 |
| droplet MDA              |                  | run6_7_S14_dups_marked_HMMcopy_output   | 0.989635 |
| droplet MDA              |                  | run12_S4_dups_marked_HMMcopy_output     | 1.023491 |
| droplet MDA              |                  | run6_7_S36_dups_marked_HMMcopy_output   | 1.072972 |
| droplet MDA              |                  | run6_7_S35_dups_marked_HMMcopy_output   | 1.112805 |
| droplet MDA              |                  | run12_S6_dups_marked_HMMcopy_output     | 1.296385 |
| droplet MDA              |                  | run12_S7_dups_marked_HMMcopy_output     | 1.308626 |
| droplet MDA              |                  | run12_S5_dups_marked_HMMcopy_output     | 1.458919 |
| droplet MDA              |                  | run6_7_S34_dups_marked_HMMcopy_output   | 2.616446 |
| droplet MDA              |                  | run12_S1_dups_marked_HMMcopy_output     | 2.860532 |
| droplet MDA              |                  | run12_S3_dups_marked_HMMcopy_output     | 5.014445 |
| droplet MDA              |                  | run12_S11_dups_marked_HMMcopy_output    | 6.296878 |
| 184-hTERT<br>genomic DNA | unamplified bulk | S47_dups_marked_HMMcopy_output          | 0.132559 |
| MALBAC                   |                  | SRX202978_dups_marked_HMMcopy_output    | 0.157532 |
| MALBAC                   |                  | SRX202787_dups_marked_HMMcopy_output    | 0.160337 |
| MALBAC                   |                  | SRX204744_dups_marked_HMMcopy_output    | 0.177799 |
| MALBAC                   |                  | SRX205035_dups_marked_HMMcopy_output    | 0.209644 |
| MALBAC                   |                  | SRX204745_dups_marked_HMMcopy_output    | 0.234382 |
| nuc-seq                  |                  | SRR504599_dups_marked_HMMcopy_output    | 0.452437 |
| nuc-seq                  |                  | SRR504607_dups_marked_HMMcopy_output    | 0.762318 |
| custom microfluidic MDA  |                  | SRX151853_dups_marked_HMMcopy_output    | 0.800449 |
| custom microfluidic MDA  |                  | SRX151727_dups_marked_HMMcopy_output    | 1.5626   |
| custom microfluidic MDA  |                  | SRX151728_dups_marked_HMMcopy_output    | 1.632294 |
| custom microfluidic MDA  |                  | SRX151846_dups_marked_HMMcopy_output    | 1.932129 |
| custom microfluidic MDA  |                  | SRX151850_dups_marked_HMMcopy_output    | 2.174643 |
| custom microfluidic MDA  |                  | SRX151852_dups_marked_HMMcopy_output    | 2.887877 |
| custom microfluidic MDA  |                  | SRX151616_dups_marked_HMMcopy_output    | 3.195293 |
| custom microfluidic MDA  |                  | SRX151729_dups_marked_HMMcopy_output    | 6.822982 |
| MIDAS                    |                  | SRX316150_1_dups_marked_HMMcopy_output  | 0.101893 |
| MIDAS                    |                  | SRX316149_1_dups_marked_HMMcopy_output  | 0.105317 |

**Table S5.** Size ranges of copy number segments found in two or more TOV2295 single cells and bulk DNA.

| Bin size | Segments found in 2 or more samples including single cells and bulk DNA |                 | Segments found in 2 or more single cells but not in bulk DNA |                 |
|----------|-------------------------------------------------------------------------|-----------------|--------------------------------------------------------------|-----------------|
|          | Number of segments                                                      | Size range      | Number of segments                                           | Size range      |
| 1 Mb     | 71                                                                      | 7 Mb - 157 Mb   | 37                                                           | 7 Mb - 126 Mb   |
| 100 kb   | 56                                                                      | 1 Mb - 115 Mb   | 43                                                           | 1 Mb – 58.6 Mb  |
| 10 kb    | 61                                                                      | 30 kb – 19.1 Mb | 59                                                           | 30 kb – 19.1 Mb |

**Table S6.** Copy number segments identified in two or more TOV2295 single-cell and bulk DNA samples using a 10-kb bin size.

“State” values correspond to the following copy numbers:

| state | copy number |
|-------|-------------|
| 1     | 0 copies    |
| 2     | 1 copy      |
| 3     | 2 copies    |
| 4     | 3 copies    |
| 5     | 4 copies    |
| 6     | 5 copies    |
| 7     | ≥ 6 copies  |

| chromosome | start      | end        | state | size     | Number of samples |
|------------|------------|------------|-------|----------|-------------------|
| 1          | 144950001  | 145410000  | 7     | 4.60E+05 | 2                 |
| 2          | 259790001  | 260630000  | 2     | 8.40E+05 | 3                 |
| 2          | 260630001  | 260730000  | 1     | 1.00E+05 | 2                 |
| 2          | 339530001  | 341120000  | 4     | 1.59E+06 | 2                 |
| 2          | 339530001  | 341180000  | 5     | 1.65E+06 | 2                 |
| 2          | 381550001  | 383010000  | 4     | 1.46E+06 | 2                 |
| 2          | 445790001  | 446180000  | 4     | 3.90E+05 | 2                 |
| 2          | 482980001  | 483410000  | 2     | 4.30E+05 | 2                 |
| 3          | 492460001  | 493170000  | 2     | 7.10E+05 | 2                 |
| 3          | 593820001  | 593910000  | 2     | 9.00E+04 | 2                 |
| 3          | 617410001  | 617540000  | 5     | 1.30E+05 | 2                 |
| 3          | 634890001  | 634990000  | 5     | 1.00E+05 | 2                 |
| 3          | 666700001  | 666870000  | 3     | 1.70E+05 | 2                 |
| 4          | 725270001  | 725320000  | 1     | 5.00E+04 | 4                 |
| 4          | 805950001  | 806180000  | 2     | 2.30E+05 | 2                 |
| 4          | 881030001  | 881170000  | 4     | 1.40E+05 | 3                 |
| 4          | 881030001  | 881180000  | 4     | 1.50E+05 | 2                 |
| 4          | 881170001  | 881650000  | 2     | 4.80E+05 | 4                 |
| 4          | 881180001  | 881650000  | 1     | 4.70E+05 | 3                 |
| 5          | 903110001  | 903220000  | 7     | 1.10E+05 | 2                 |
| 5          | 1014350001 | 1016680000 | 2     | 2.33E+06 | 2                 |
| 5          | 1039340001 | 1039400000 | 2     | 6.00E+04 | 2                 |
| 6          | 1120180001 | 1120650000 | 2     | 4.70E+05 | 2                 |
| 6          | 1120200001 | 1120650000 | 2     | 4.50E+05 | 2                 |
| 6          | 1120650001 | 1121310000 | 4     | 6.60E+05 | 2                 |
| 6          | 1166680001 | 1166920000 | 2     | 2.40E+05 | 2                 |
| 7          | 1278050001 | 1278270000 | 4     | 2.20E+05 | 2                 |
| 7          | 1291280001 | 1291600000 | 4     | 3.20E+05 | 2                 |
| 7          | 1291320001 | 1291600000 | 4     | 2.80E+05 | 2                 |

|    |            |            |   |          |   |
|----|------------|------------|---|----------|---|
| 7  | 1314820001 | 1315270000 | 3 | 4.50E+05 | 2 |
| 8  | 1436190001 | 1439830000 | 2 | 3.64E+06 | 2 |
| 9  | 1576770001 | 1576900000 | 4 | 1.30E+05 | 2 |
| 9  | 1634920001 | 1635300000 | 2 | 3.80E+05 | 2 |
| 9  | 1654910001 | 1655060000 | 4 | 1.50E+05 | 2 |
| 9  | 1658200001 | 1658460000 | 2 | 2.60E+05 | 2 |
| 9  | 1680200001 | 1680420000 | 2 | 2.20E+05 | 2 |
| 10 | 1715820001 | 1.72E+09   | 3 | 1.18E+06 | 2 |
| 10 | 1719060001 | 1723230000 | 1 | 4.17E+06 | 2 |
| 10 | 1813930001 | 1814170000 | 4 | 2.40E+05 | 2 |
| 11 | 1867540001 | 1871040000 | 1 | 3.50E+06 | 3 |
| 11 | 1876550001 | 1876760000 | 2 | 2.10E+05 | 2 |
| 12 | 2042310001 | 2042590000 | 2 | 2.80E+05 | 2 |
| 14 | 2200000001 | 2219140000 | 2 | 1.91E+07 | 2 |
| 14 | 2219140001 | 2219320000 | 1 | 1.80E+05 | 2 |
| 16 | 2432390001 | 2432600000 | 5 | 2.10E+05 | 2 |
| 17 | 2500250001 | 2500400000 | 1 | 1.50E+05 | 2 |
| 17 | 2536440001 | 2536730000 | 4 | 2.90E+05 | 2 |
| 17 | 2564410001 | 2564790000 | 2 | 3.80E+05 | 2 |
| 17 | 2578750001 | 2578860000 | 7 | 1.10E+05 | 2 |
| 18 | 2600780001 | 2600840000 | 7 | 6.00E+04 | 2 |
| 18 | 2609360001 | 2609450000 | 2 | 9.00E+04 | 2 |
| 18 | 2651020001 | 2651050000 | 7 | 3.00E+04 | 2 |
| 20 | 2737770001 | 2737880000 | 5 | 1.10E+05 | 2 |
| 20 | 2738890001 | 2739100000 | 2 | 2.10E+05 | 2 |
| 20 | 2741800001 | 2741960000 | 4 | 1.60E+05 | 2 |
| 21 | 2781690001 | 2792410000 | 3 | 1.07E+07 | 3 |
| 21 | 2781690001 | 2792410000 | 2 | 1.07E+07 | 2 |
| 21 | 2792410001 | 2792550000 | 1 | 1.40E+05 | 3 |
| 22 | 2829820001 | 2846330000 | 2 | 1.65E+07 | 4 |
| 22 | 2846330001 | 2846900000 | 1 | 5.70E+05 | 2 |
| X  | 2927630001 | 2927750000 | 4 | 1.20E+05 | 2 |

**Table S7.** SNV false and true positive rates for various mutationSeq parameters.

Table headings are defined as follows.

- mutationSeq SNV prob: mutationSeq SNV-calling probability threshold
- minimum single-cell coverage depth: Minimum single-cell coverage depth for which a reference-matching or non-reference-matching site was considered
- reference-matching sites: Number of dbSNP SNV sites at which the bulk sample had a coverage depth of at least 50 reads where all reads matched the reference
- SNVs at reference-matching sites: Number of reference-matching sites with specified minimum single-cell coverage depth at which mutationSeq has called an SNV (mismatch between single-cell and reference)
- Non-reference-matching sites: Number of dbSNP SNV sites at which the bulk sample had a coverage depth of at least 50 reads where all reads did not match the reference
- SNVs at non-reference-matching sites: Number of non-reference-matching sites with specified minimum single-cell coverage depth at which mutationSeq has called an SNV
- False positive rate: SNVs at reference-matching sites divided by reference-matching sites
- True positive rate: SNVs at non-reference-matching sites divided by non-reference-matching sites

| mutationSeq SNV prob. | minimum single-cell coverage depth | reference-matching sites | SNVs at reference-matching sites | non-reference-matching sites | SNVs at non-reference-matching sites | false positive rate | true positive rate |
|-----------------------|------------------------------------|--------------------------|----------------------------------|------------------------------|--------------------------------------|---------------------|--------------------|
| 0.6                   | 1                                  | 9419807                  | 1926375                          | 118645                       | 118134                               | 2.04503E-01         | 0.99569            |
| 0.6                   | 2                                  | 8732730                  | 1914058                          | 109728                       | 109431                               | 2.19182E-01         | 0.99729            |
| 0.6                   | 3                                  | 8120725                  | 1903354                          | 101784                       | 101557                               | 2.34382E-01         | 0.99777            |
| 0.6                   | 4                                  | 7690746                  | 1896294                          | 96247                        | 96050                                | 2.46568E-01         | 0.99795            |
| 0.6                   | 5                                  | 7295308                  | 1889028                          | 91251                        | 91063                                | 2.58937E-01         | 0.99794            |
| 0.6                   | 6                                  | 6976342                  | 1886359                          | 87266                        | 87086                                | 2.70394E-01         | 0.99794            |
| 0.6                   | 8                                  | 6433972                  | 1882315                          | 80422                        | 80252                                | 2.92559E-01         | 0.99789            |
| 0.6                   | 10                                 | 5996999                  | 1880006                          | 74938                        | 74771                                | 3.13491E-01         | 0.99777            |
| 0.6                   | 15                                 | 5178555                  | 1826657                          | 64626                        | 64465                                | 3.52735E-01         | 0.99751            |
| 0.6                   | 20                                 | 4590165                  | 1737401                          | 57350                        | 57193                                | 3.78505E-01         | 0.99726            |
| 0.6                   | 30                                 | 3773656                  | 1329513                          | 47175                        | 47020                                | 3.52314E-01         | 0.99671            |
| 0.6                   | 40                                 | 3217070                  | 965606                           | 40207                        | 40053                                | 3.00151E-01         | 0.99617            |
| 0.7                   | 1                                  | 9419807                  | 43754                            | 118645                       | 114591                               | 4.64489E-03         | 0.96583            |
| 0.7                   | 2                                  | 8732730                  | 33032                            | 109728                       | 105935                               | 3.78255E-03         | 0.96543            |
| 0.7                   | 3                                  | 8120725                  | 27644                            | 101784                       | 98095                                | 3.40413E-03         | 0.96376            |
| 0.7                   | 4                                  | 7690746                  | 25351                            | 96247                        | 92617                                | 3.29630E-03         | 0.96228            |
| 0.7                   | 5                                  | 7295308                  | 23096                            | 91251                        | 87647                                | 3.16587E-03         | 0.96050            |
| 0.7                   | 6                                  | 6976342                  | 22371                            | 87266                        | 83674                                | 3.20669E-03         | 0.95884            |
| 0.7                   | 8                                  | 6433972                  | 21260                            | 80422                        | 76848                                | 3.30434E-03         | 0.95556            |

|      |    |         |       |        |        |             |         |
|------|----|---------|-------|--------|--------|-------------|---------|
| 0.7  | 10 | 5996999 | 20622 | 74938  | 71374  | 3.43872E-03 | 0.95244 |
| 0.7  | 15 | 5178555 | 19841 | 64626  | 61072  | 3.83138E-03 | 0.94501 |
| 0.7  | 20 | 4590165 | 19467 | 57350  | 53800  | 4.24102E-03 | 0.93810 |
| 0.7  | 30 | 3773656 | 16166 | 47175  | 43627  | 4.28391E-03 | 0.92479 |
| 0.7  | 40 | 3217070 | 10370 | 40207  | 36661  | 3.22343E-03 | 0.91181 |
| 0.8  | 1  | 9419807 | 10095 | 118645 | 108795 | 1.07168E-03 | 0.91698 |
| 0.8  | 2  | 8732730 | 3998  | 109728 | 100713 | 4.57818E-04 | 0.91784 |
| 0.8  | 3  | 8120725 | 2027  | 101784 | 93205  | 2.49608E-04 | 0.91571 |
| 0.8  | 4  | 7690746 | 1406  | 96247  | 87839  | 1.82817E-04 | 0.91264 |
| 0.8  | 5  | 7295308 | 1000  | 91251  | 82941  | 1.37074E-04 | 0.90893 |
| 0.8  | 6  | 6976342 | 820   | 87266  | 79016  | 1.17540E-04 | 0.90546 |
| 0.8  | 8  | 6433972 | 580   | 80422  | 72254  | 9.01465E-05 | 0.89844 |
| 0.8  | 10 | 5996999 | 479   | 74938  | 66822  | 7.98733E-05 | 0.89170 |
| 0.8  | 15 | 5178555 | 290   | 64626  | 56600  | 5.60002E-05 | 0.87581 |
| 0.8  | 20 | 4590165 | 184   | 57350  | 49370  | 4.00857E-05 | 0.86085 |
| 0.8  | 30 | 3773656 | 92    | 47175  | 39238  | 2.43795E-05 | 0.83175 |
| 0.8  | 40 | 3217070 | 58    | 40207  | 32299  | 1.80288E-05 | 0.80332 |
| 0.9  | 1  | 9419807 | 724   | 118645 | 82543  | 7.68593E-05 | 0.69571 |
| 0.9  | 2  | 8732730 | 420   | 109728 | 79869  | 4.80949E-05 | 0.72788 |
| 0.9  | 3  | 8120725 | 313   | 101784 | 77010  | 3.85434E-05 | 0.75660 |
| 0.9  | 4  | 7690746 | 260   | 96247  | 73453  | 3.38069E-05 | 0.76317 |
| 0.9  | 5  | 7295308 | 176   | 91251  | 68951  | 2.41251E-05 | 0.75562 |
| 0.9  | 6  | 6976342 | 134   | 87266  | 65347  | 1.92078E-05 | 0.74883 |
| 0.9  | 8  | 6433972 | 100   | 80422  | 59133  | 1.55425E-05 | 0.73528 |
| 0.9  | 10 | 5996999 | 75    | 74938  | 54086  | 1.25063E-05 | 0.72174 |
| 0.9  | 15 | 5178555 | 50    | 64626  | 44469  | 9.65520E-06 | 0.68810 |
| 0.9  | 20 | 4590165 | 28    | 57350  | 37616  | 6.10000E-06 | 0.65590 |
| 0.9  | 30 | 3773656 | 8     | 47175  | 28119  | 2.11996E-06 | 0.59606 |
| 0.9  | 40 | 3217070 | 5     | 40207  | 21807  | 1.55421E-06 | 0.54237 |
| 0.91 | 1  | 9419807 | 280   | 118645 | 74569  | 2.97246E-05 | 0.62851 |
| 0.91 | 2  | 8732730 | 246   | 109728 | 73599  | 2.81699E-05 | 0.67074 |
| 0.91 | 3  | 8120725 | 233   | 101784 | 72664  | 2.86920E-05 | 0.71390 |
| 0.91 | 4  | 7690746 | 202   | 96247  | 70012  | 2.62653E-05 | 0.72742 |
| 0.91 | 5  | 7295308 | 140   | 91251  | 65790  | 1.91904E-05 | 0.72098 |
| 0.91 | 6  | 6976342 | 109   | 87266  | 62365  | 1.56242E-05 | 0.71465 |
| 0.91 | 8  | 6433972 | 83    | 80422  | 56472  | 1.29003E-05 | 0.70220 |
| 0.91 | 10 | 5996999 | 63    | 74938  | 51598  | 1.05053E-05 | 0.68854 |
| 0.91 | 15 | 5178555 | 41    | 64626  | 42263  | 7.91727E-06 | 0.65396 |
| 0.91 | 20 | 4590165 | 23    | 57350  | 35554  | 5.01071E-06 | 0.61995 |
| 0.91 | 30 | 3773656 | 8     | 47175  | 26279  | 2.11996E-06 | 0.55705 |
| 0.91 | 40 | 3217070 | 5     | 40207  | 20159  | 1.55421E-06 | 0.50138 |
| 0.92 | 1  | 9419807 | 166   | 118645 | 66627  | 1.76224E-05 | 0.56157 |
| 0.92 | 2  | 8732730 | 165   | 109728 | 66585  | 1.88944E-05 | 0.60682 |
| 0.92 | 3  | 8120725 | 161   | 101784 | 66386  | 1.98258E-05 | 0.65222 |
| 0.92 | 4  | 7690746 | 143   | 96247  | 64675  | 1.85938E-05 | 0.67197 |

|      |    |         |     |        |       |             |         |
|------|----|---------|-----|--------|-------|-------------|---------|
| 0.92 | 5  | 7295308 | 98  | 91251  | 60834 | 1.34333E-05 | 0.66667 |
| 0.92 | 6  | 6976342 | 82  | 87266  | 57727 | 1.17540E-05 | 0.66151 |
| 0.92 | 8  | 6433972 | 66  | 80422  | 52420 | 1.02580E-05 | 0.65181 |
| 0.92 | 10 | 5996999 | 52  | 74938  | 47852 | 8.67100E-06 | 0.63855 |
| 0.92 | 15 | 5178555 | 34  | 64626  | 38939 | 6.56554E-06 | 0.60253 |
| 0.92 | 20 | 4590165 | 19  | 57350  | 32476 | 4.13928E-06 | 0.56628 |
| 0.92 | 30 | 3773656 | 8   | 47175  | 23557 | 2.11996E-06 | 0.49935 |
| 0.92 | 40 | 3217070 | 5   | 40207  | 17831 | 1.55421E-06 | 0.44348 |
| 0.93 | 1  | 9419807 | 112 | 118645 | 58252 | 1.18898E-05 | 0.49098 |
| 0.93 | 2  | 8732730 | 112 | 109728 | 58252 | 1.28253E-05 | 0.53088 |
| 0.93 | 3  | 8120725 | 112 | 101784 | 58251 | 1.37919E-05 | 0.57230 |
| 0.93 | 4  | 7690746 | 110 | 96247  | 57503 | 1.43029E-05 | 0.59745 |
| 0.93 | 5  | 7295308 | 74  | 91251  | 54026 | 1.01435E-05 | 0.59206 |
| 0.93 | 6  | 6976342 | 61  | 87266  | 51227 | 8.74384E-06 | 0.58702 |
| 0.93 | 8  | 6433972 | 49  | 80422  | 46511 | 7.61582E-06 | 0.57834 |
| 0.93 | 10 | 5996999 | 38  | 74938  | 42450 | 6.33650E-06 | 0.56647 |
| 0.93 | 15 | 5178555 | 28  | 64626  | 34318 | 5.40691E-06 | 0.53102 |
| 0.93 | 20 | 4590165 | 16  | 57350  | 28250 | 3.48571E-06 | 0.49259 |
| 0.93 | 30 | 3773656 | 7   | 47175  | 20030 | 1.85497E-06 | 0.42459 |
| 0.93 | 40 | 3217070 | 5   | 40207  | 14905 | 1.55421E-06 | 0.37071 |
| 0.94 | 1  | 9419807 | 75  | 118645 | 50393 | 7.96195E-06 | 0.42474 |
| 0.94 | 2  | 8732730 | 75  | 109728 | 50393 | 8.58838E-06 | 0.45925 |
| 0.94 | 3  | 8120725 | 75  | 101784 | 50393 | 9.23563E-06 | 0.49510 |
| 0.94 | 4  | 7690746 | 75  | 96247  | 50177 | 9.75198E-06 | 0.52134 |
| 0.94 | 5  | 7295308 | 49  | 91251  | 47052 | 6.71665E-06 | 0.51563 |
| 0.94 | 6  | 6976342 | 38  | 87266  | 44477 | 5.44698E-06 | 0.50967 |
| 0.94 | 8  | 6433972 | 29  | 80422  | 40186 | 4.50732E-06 | 0.49969 |
| 0.94 | 10 | 5996999 | 23  | 74938  | 36584 | 3.83525E-06 | 0.48819 |
| 0.94 | 15 | 5178555 | 20  | 64626  | 29471 | 3.86208E-06 | 0.45602 |
| 0.94 | 20 | 4590165 | 11  | 57350  | 24081 | 2.39643E-06 | 0.41990 |
| 0.94 | 30 | 3773656 | 5   | 47175  | 16858 | 1.32498E-06 | 0.35735 |
| 0.94 | 40 | 3217070 | 4   | 40207  | 12386 | 1.24337E-06 | 0.30806 |
| 0.95 | 1  | 9419807 | 46  | 118645 | 42279 | 4.88333E-06 | 0.35635 |
| 0.95 | 2  | 8732730 | 46  | 109728 | 42279 | 5.26754E-06 | 0.38531 |
| 0.95 | 3  | 8120725 | 46  | 101784 | 42279 | 5.66452E-06 | 0.41538 |
| 0.95 | 4  | 7690746 | 46  | 96247  | 42279 | 5.98121E-06 | 0.43928 |
| 0.95 | 5  | 7295308 | 34  | 91251  | 39857 | 4.66053E-06 | 0.43678 |
| 0.95 | 6  | 6976342 | 27  | 87266  | 37864 | 3.87022E-06 | 0.43389 |
| 0.95 | 8  | 6433972 | 21  | 80422  | 34434 | 3.26392E-06 | 0.42817 |
| 0.95 | 10 | 5996999 | 18  | 74938  | 31377 | 3.00150E-06 | 0.41871 |
| 0.95 | 15 | 5178555 | 16  | 64626  | 25035 | 3.08966E-06 | 0.38738 |
| 0.95 | 20 | 4590165 | 10  | 57350  | 20319 | 2.17857E-06 | 0.35430 |
| 0.95 | 30 | 3773656 | 5   | 47175  | 13920 | 1.32498E-06 | 0.29507 |
| 0.95 | 40 | 3217070 | 4   | 40207  | 9978  | 1.24337E-06 | 0.24817 |
| 0.96 | 1  | 9419807 | 26  | 118645 | 32133 | 2.76014E-06 | 0.27083 |



|      |    |         |    |        |       |             |         |
|------|----|---------|----|--------|-------|-------------|---------|
| 0.96 | 2  | 8732730 | 26 | 109728 | 32133 | 2.97730E-06 | 0.29284 |
| 0.96 | 3  | 8120725 | 26 | 101784 | 32133 | 3.20168E-06 | 0.31570 |
| 0.96 | 4  | 7690746 | 26 | 96247  | 32133 | 3.38069E-06 | 0.33386 |
| 0.96 | 5  | 7295308 | 19 | 91251  | 30372 | 2.60441E-06 | 0.33284 |
| 0.96 | 6  | 6976342 | 18 | 87266  | 28904 | 2.58015E-06 | 0.33122 |
| 0.96 | 8  | 6433972 | 15 | 80422  | 26432 | 2.33137E-06 | 0.32867 |
| 0.96 | 10 | 5996999 | 14 | 74938  | 24135 | 2.33450E-06 | 0.32207 |
| 0.96 | 15 | 5178555 | 13 | 64626  | 18997 | 2.51035E-06 | 0.29395 |
| 0.96 | 20 | 4590165 | 10 | 57350  | 14874 | 2.17857E-06 | 0.25935 |
| 0.96 | 30 | 3773656 | 5  | 47175  | 9542  | 1.32498E-06 | 0.20227 |
| 0.96 | 40 | 3217070 | 4  | 40207  | 6470  | 1.24337E-06 | 0.16092 |
| 0.97 | 1  | 9419807 | 11 | 118645 | 18341 | 1.16775E-06 | 0.15459 |
| 0.97 | 2  | 8732730 | 11 | 109728 | 18341 | 1.25963E-06 | 0.16715 |
| 0.97 | 3  | 8120725 | 11 | 101784 | 18341 | 1.35456E-06 | 0.18020 |
| 0.97 | 4  | 7690746 | 11 | 96247  | 18341 | 1.43029E-06 | 0.19056 |
| 0.97 | 5  | 7295308 | 9  | 91251  | 17589 | 1.23367E-06 | 0.19275 |
| 0.97 | 6  | 6976342 | 9  | 87266  | 16962 | 1.29007E-06 | 0.19437 |
| 0.97 | 8  | 6433972 | 9  | 80422  | 15978 | 1.39882E-06 | 0.19868 |
| 0.97 | 10 | 5996999 | 9  | 74938  | 14709 | 1.50075E-06 | 0.19628 |
| 0.97 | 15 | 5178555 | 8  | 64626  | 11412 | 1.54483E-06 | 0.17659 |
| 0.97 | 20 | 4590165 | 6  | 57350  | 8392  | 1.30714E-06 | 0.14633 |
| 0.97 | 30 | 3773656 | 3  | 47175  | 4803  | 7.94985E-07 | 0.10181 |
| 0.97 | 40 | 3217070 | 3  | 40207  | 3027  | 9.32526E-07 | 0.07529 |
| 0.98 | 1  | 9419807 | 4  | 118645 | 7466  | 4.24637E-07 | 0.06293 |
| 0.98 | 2  | 8732730 | 4  | 109728 | 7466  | 4.58047E-07 | 0.06804 |
| 0.98 | 3  | 8120725 | 4  | 101784 | 7466  | 4.92567E-07 | 0.07335 |
| 0.98 | 4  | 7690746 | 4  | 96247  | 7466  | 5.20106E-07 | 0.07757 |
| 0.98 | 5  | 7295308 | 3  | 91251  | 7097  | 4.11223E-07 | 0.07777 |
| 0.98 | 6  | 6976342 | 3  | 87266  | 6784  | 4.30025E-07 | 0.07774 |
| 0.98 | 8  | 6433972 | 3  | 80422  | 6329  | 4.66275E-07 | 0.07870 |
| 0.98 | 10 | 5996999 | 3  | 74938  | 5853  | 5.00250E-07 | 0.07810 |
| 0.98 | 15 | 5178555 | 3  | 64626  | 4445  | 5.79312E-07 | 0.06878 |
| 0.98 | 20 | 4590165 | 2  | 57350  | 2698  | 4.35714E-07 | 0.04704 |
| 0.98 | 30 | 3773656 | 1  | 47175  | 983   | 2.64995E-07 | 0.02084 |
| 0.98 | 40 | 3217070 | 1  | 40207  | 451   | 3.10842E-07 | 0.01122 |
| 0.99 | 1  | 9419807 | 0  | 118645 | 1223  | 0           | 0.01031 |
| 0.99 | 2  | 8732730 | 0  | 109728 | 1223  | 0           | 0.01115 |
| 0.99 | 3  | 8120725 | 0  | 101784 | 1223  | 0           | 0.01202 |
| 0.99 | 4  | 7690746 | 0  | 96247  | 1223  | 0           | 0.01271 |
| 0.99 | 5  | 7295308 | 0  | 91251  | 1221  | 0           | 0.01338 |
| 0.99 | 6  | 6976342 | 0  | 87266  | 1220  | 0           | 0.01398 |
| 0.99 | 8  | 6433972 | 0  | 80422  | 1217  | 0           | 0.01513 |
| 0.99 | 10 | 5996999 | 0  | 74938  | 1122  | 0           | 0.01497 |
| 0.99 | 15 | 5178555 | 0  | 64626  | 813   | 0           | 0.01258 |
| 0.99 | 20 | 4590165 | 0  | 57350  | 402   | 0           | 0.00701 |

|      |    |         |   |       |    |   |         |
|------|----|---------|---|-------|----|---|---------|
| 0.99 | 30 | 3773656 | 0 | 47175 | 68 | 0 | 0.00144 |
| 0.99 | 40 | 3217070 | 0 | 40207 | 16 | 0 | 0.00040 |

**Table S8.** Copy number segments identified in two or more single-cell and bulk DNA samples from ovarian cancer specimen 1 using a 1-Mb bin size.

“State” values correspond to the following copy numbers:

| state | copy number |
|-------|-------------|
| 1     | 0 copies    |
| 2     | 1 copy      |
| 3     | 2 copies    |
| 4     | 3 copies    |
| 5     | 4 copies    |
| 6     | 5 copies    |
| 7     | ≥ 6 copies  |

| chromosome | start      | end        | state | size     | Number of samples |
|------------|------------|------------|-------|----------|-------------------|
| 1          | 1          | 250000000  | 3     | 2.50E+08 | 9                 |
| 2          | 250000001  | 494000000  | 3     | 2.44E+08 | 2                 |
| 3          | 494000001  | 693000000  | 3     | 1.99E+08 | 11                |
| 4          | 693000001  | 885000000  | 3     | 1.92E+08 | 16                |
| 5          | 885000001  | 1066000000 | 3     | 1.81E+08 | 16                |
| 6          | 1066000001 | 1238000000 | 3     | 1.72E+08 | 13                |
| 7          | 1238000001 | 1398000000 | 3     | 1.60E+08 | 2                 |
| 7          | 1238000001 | 1398000000 | 4     | 1.60E+08 | 12                |
| 8          | 1398000001 | 1439000000 | 2     | 4.10E+07 | 2                 |
| 8          | 1398000001 | 1441000000 | 2     | 4.30E+07 | 5                 |
| 8          | 1398000001 | 1445000000 | 2     | 4.70E+07 | 2                 |
| 8          | 1398000001 | 1545000000 | 3     | 1.47E+08 | 2                 |
| 8          | 1439000001 | 1545000000 | 3     | 1.06E+08 | 2                 |
| 8          | 1441000001 | 1545000000 | 3     | 1.04E+08 | 4                 |
| 9          | 1545000001 | 1584000000 | 4     | 3.90E+07 | 2                 |
| 9          | 1545000001 | 1687000000 | 3     | 1.42E+08 | 12                |
| 9          | 1584000001 | 1687000000 | 3     | 1.03E+08 | 2                 |
| 10         | 1687000001 | 1725000000 | 4     | 3.80E+07 | 8                 |
| 10         | 1687000001 | 1731000000 | 4     | 4.40E+07 | 2                 |
| 10         | 1687000001 | 1823000000 | 3     | 1.36E+08 | 2                 |
| 10         | 1725000001 | 1823000000 | 2     | 9.80E+07 | 7                 |
| 10         | 1731000001 | 1823000000 | 2     | 9.20E+07 | 2                 |
| 11         | 1823000001 | 1959000000 | 3     | 1.36E+08 | 14                |
| 12         | 1959000001 | 1993000000 | 4     | 3.40E+07 | 2                 |
| 12         | 1959000001 | 1999000000 | 4     | 4.00E+07 | 3                 |
| 12         | 1959000001 | 2093000000 | 2     | 1.34E+08 | 2                 |
| 12         | 1959000001 | 2093000000 | 3     | 1.34E+08 | 4                 |

|    |            |            |   |          |    |
|----|------------|------------|---|----------|----|
| 12 | 1999000001 | 2093000000 | 3 | 9.40E+07 | 3  |
| 13 | 2093000001 | 2209000000 | 3 | 1.16E+08 | 12 |
| 14 | 2209000001 | 2317000000 | 3 | 1.08E+08 | 13 |
| 15 | 2317000001 | 2420000000 | 3 | 1.03E+08 | 15 |
| 16 | 2420000001 | 2447000000 | 3 | 2.70E+07 | 3  |
| 16 | 2420000001 | 2467000000 | 3 | 4.70E+07 | 4  |
| 16 | 2420000001 | 2468000000 | 3 | 4.80E+07 | 2  |
| 16 | 2420000001 | 2511000000 | 2 | 9.10E+07 | 3  |
| 16 | 2420000001 | 2511000000 | 3 | 9.10E+07 | 3  |
| 16 | 2447000001 | 2511000000 | 2 | 6.40E+07 | 3  |
| 16 | 2467000001 | 2511000000 | 2 | 4.40E+07 | 4  |
| 16 | 2468000001 | 2511000000 | 2 | 4.30E+07 | 2  |
| 17 | 2511000001 | 2552000000 | 2 | 4.10E+07 | 2  |
| 17 | 2511000001 | 2593000000 | 2 | 8.20E+07 | 3  |
| 17 | 2511000001 | 2593000000 | 3 | 8.20E+07 | 7  |
| 18 | 2593000001 | 2614000000 | 2 | 2.10E+07 | 2  |
| 18 | 2593000001 | 2672000000 | 2 | 7.90E+07 | 12 |
| 18 | 2626000001 | 2672000000 | 2 | 4.60E+07 | 2  |
| 18 | 2655000001 | 2672000000 | 2 | 1.70E+07 | 2  |
| 19 | 2672000001 | 2719000000 | 7 | 4.70E+07 | 8  |
| 19 | 2672000001 | 2732000000 | 3 | 6.00E+07 | 4  |
| 19 | 2719000001 | 2732000000 | 2 | 1.30E+07 | 3  |
| 19 | 2719000001 | 2732000000 | 3 | 1.30E+07 | 7  |
| 19 | 2723000001 | 2732000000 | 3 | 9.00E+06 | 2  |
| 20 | 2732000001 | 2796000000 | 3 | 6.40E+07 | 17 |
| 21 | 2796000001 | 2845000000 | 2 | 4.90E+07 | 5  |
| 21 | 2796000001 | 2845000000 | 3 | 4.90E+07 | 14 |
| 22 | 2845000001 | 2897000000 | 1 | 5.20E+07 | 2  |
| 22 | 2845000001 | 2897000000 | 2 | 5.20E+07 | 13 |
| 22 | 2845000001 | 2897000000 | 3 | 5.20E+07 | 3  |
| X  | 2898000001 | 3054000000 | 2 | 1.56E+08 | 12 |
| X  | 2898000001 | 3054000000 | 3 | 1.56E+08 | 3  |

**Table S9.** Copy number segments identified in two or more single-cell and bulk DNA samples from ovarian cancer specimen 2 using a 1-Mb bin size.

“State” values correspond to the following copy numbers:

| state | copy number |
|-------|-------------|
| 1     | 0 copies    |
| 2     | 1 copy      |
| 3     | 2 copies    |
| 4     | 3 copies    |
| 5     | 4 copies    |
| 6     | 5 copies    |
| 7     | ≥ 6 copies  |

| chromosome | start     | end        | state | size     | Number of samples |
|------------|-----------|------------|-------|----------|-------------------|
| 1          | 1         | 36000000   | 2     | 3.60E+07 | 3                 |
| 1          | 1         | 37000000   | 2     | 3.70E+07 | 2                 |
| 1          | 1         | 38000000   | 2     | 3.80E+07 | 5                 |
| 1          | 1         | 250000000  | 3     | 2.50E+08 | 4                 |
| 1          | 36000001  | 250000000  | 3     | 2.14E+08 | 2                 |
| 1          | 37000001  | 250000000  | 3     | 2.13E+08 | 2                 |
| 1          | 38000001  | 250000000  | 3     | 2.12E+08 | 4                 |
| 2          | 250000001 | 278000000  | 2     | 2.80E+07 | 9                 |
| 2          | 250000001 | 494000000  | 3     | 2.44E+08 | 3                 |
| 2          | 278000001 | 494000000  | 3     | 2.16E+08 | 5                 |
| 3          | 494000001 | 682000000  | 3     | 1.88E+08 | 4                 |
| 3          | 494000001 | 693000000  | 3     | 1.99E+08 | 8                 |
| 3          | 682000001 | 693000000  | 2     | 1.10E+07 | 4                 |
| 4          | 693000001 | 750000000  | 3     | 5.70E+07 | 8                 |
| 4          | 693000001 | 885000000  | 3     | 1.92E+08 | 3                 |
| 4          | 750000001 | 825000000  | 2     | 7.50E+07 | 2                 |
| 4          | 750000001 | 826000000  | 2     | 7.60E+07 | 3                 |
| 4          | 750000001 | 885000000  | 2     | 1.35E+08 | 2                 |
| 4          | 826000001 | 851000000  | 3     | 2.50E+07 | 3                 |
| 4          | 851000001 | 885000000  | 2     | 3.40E+07 | 5                 |
| 5          | 885000001 | 906000000  | 4     | 2.10E+07 | 3                 |
| 5          | 885000001 | 908000000  | 4     | 2.30E+07 | 2                 |
| 5          | 885000001 | 950000000  | 3     | 6.50E+07 | 3                 |
| 5          | 885000001 | 951000000  | 3     | 6.60E+07 | 3                 |
| 5          | 885000001 | 1066000000 | 3     | 1.81E+08 | 3                 |
| 5          | 950000001 | 1066000000 | 2     | 1.16E+08 | 3                 |
| 5          | 951000001 | 1066000000 | 2     | 1.15E+08 | 2                 |

|    |            |            |   |          |    |
|----|------------|------------|---|----------|----|
| 5  | 1053000001 | 1066000000 | 3 | 1.30E+07 | 2  |
| 6  | 1066000001 | 1078000000 | 2 | 1.20E+07 | 2  |
| 6  | 1066000001 | 1079000000 | 2 | 1.30E+07 | 7  |
| 6  | 1066000001 | 1080000000 | 2 | 1.40E+07 | 4  |
| 6  | 1066000001 | 1238000000 | 3 | 1.72E+08 | 2  |
| 6  | 1079000001 | 1140000000 | 3 | 6.10E+07 | 3  |
| 6  | 1080000001 | 1140000000 | 4 | 6.00E+07 | 2  |
| 6  | 1140000001 | 1175000000 | 2 | 3.50E+07 | 3  |
| 6  | 1140000001 | 1176000000 | 2 | 3.60E+07 | 2  |
| 6  | 1140000001 | 1238000000 | 2 | 9.80E+07 | 3  |
| 6  | 1191000001 | 1238000000 | 2 | 4.70E+07 | 4  |
| 6  | 1192000001 | 1238000000 | 2 | 4.60E+07 | 3  |
| 6  | 1194000001 | 1238000000 | 2 | 4.40E+07 | 2  |
| 7  | 1238000001 | 1291000000 | 3 | 5.30E+07 | 2  |
| 7  | 1238000001 | 1293000000 | 3 | 5.50E+07 | 2  |
| 7  | 1238000001 | 1294000000 | 3 | 5.60E+07 | 5  |
| 7  | 1238000001 | 1308000000 | 3 | 7.00E+07 | 2  |
| 7  | 1294000001 | 1375000000 | 4 | 8.10E+07 | 2  |
| 7  | 1294000001 | 1377000000 | 4 | 8.30E+07 | 2  |
| 7  | 1375000001 | 1398000000 | 5 | 2.30E+07 | 2  |
| 7  | 1376000001 | 1398000000 | 5 | 2.20E+07 | 2  |
| 7  | 1377000001 | 1398000000 | 5 | 2.10E+07 | 2  |
| 8  | 1398000001 | 1489000000 | 3 | 9.10E+07 | 3  |
| 8  | 1398000001 | 1491000000 | 3 | 9.30E+07 | 11 |
| 8  | 1489000001 | 1545000000 | 5 | 5.60E+07 | 2  |
| 8  | 1491000001 | 1545000000 | 4 | 5.40E+07 | 6  |
| 9  | 1545000001 | 1616000000 | 2 | 7.10E+07 | 9  |
| 9  | 1545000001 | 1618000000 | 2 | 7.30E+07 | 2  |
| 9  | 1545000001 | 1687000000 | 3 | 1.42E+08 | 4  |
| 9  | 1616000001 | 1687000000 | 3 | 7.10E+07 | 7  |
| 9  | 1618000001 | 1687000000 | 3 | 6.90E+07 | 2  |
| 9  | 1664000001 | 1687000000 | 4 | 2.30E+07 | 2  |
| 10 | 1687000001 | 1775000000 | 3 | 8.80E+07 | 5  |
| 10 | 1687000001 | 1777000000 | 3 | 9.00E+07 | 2  |
| 10 | 1687000001 | 1790000000 | 3 | 1.03E+08 | 3  |
| 10 | 1687000001 | 1794000000 | 3 | 1.07E+08 | 3  |
| 10 | 1687000001 | 1823000000 | 3 | 1.36E+08 | 2  |
| 10 | 1775000001 | 1823000000 | 2 | 4.80E+07 | 6  |
| 10 | 1777000001 | 1823000000 | 2 | 4.60E+07 | 2  |
| 10 | 1790000001 | 1823000000 | 2 | 3.30E+07 | 3  |
| 10 | 1794000001 | 1823000000 | 2 | 2.90E+07 | 3  |
| 11 | 1823000001 | 1890000000 | 3 | 6.70E+07 | 2  |
| 11 | 1823000001 | 1894000000 | 3 | 7.10E+07 | 4  |

|    |            |            |   |          |    |
|----|------------|------------|---|----------|----|
| 11 | 1823000001 | 1959000000 | 3 | 1.36E+08 | 4  |
| 11 | 1888000001 | 1959000000 | 2 | 7.10E+07 | 2  |
| 11 | 1890000001 | 1959000000 | 2 | 6.90E+07 | 2  |
| 11 | 1894000001 | 1959000000 | 2 | 6.50E+07 | 4  |
| 12 | 1959000001 | 1993000000 | 4 | 3.40E+07 | 6  |
| 12 | 1959000001 | 1997000000 | 4 | 3.80E+07 | 4  |
| 12 | 1959000001 | 2093000000 | 3 | 1.34E+08 | 2  |
| 12 | 1993000001 | 2009000000 | 2 | 1.60E+07 | 2  |
| 12 | 1997000001 | 2010000000 | 2 | 1.30E+07 | 2  |
| 12 | 2008000001 | 2093000000 | 3 | 8.50E+07 | 2  |
| 12 | 2009000001 | 2093000000 | 3 | 8.40E+07 | 3  |
| 12 | 2010000001 | 2093000000 | 3 | 8.30E+07 | 3  |
| 13 | 2093000001 | 2147000000 | 3 | 5.40E+07 | 2  |
| 13 | 2093000001 | 2156000000 | 3 | 6.30E+07 | 10 |
| 13 | 2093000001 | 2209000000 | 3 | 1.16E+08 | 4  |
| 13 | 2147000001 | 2157000000 | 4 | 1.00E+07 | 2  |
| 13 | 2156000001 | 2209000000 | 2 | 5.30E+07 | 10 |
| 13 | 2157000001 | 2209000000 | 2 | 5.20E+07 | 4  |
| 14 | 2209000001 | 2302000000 | 2 | 9.30E+07 | 6  |
| 14 | 2209000001 | 2303000000 | 2 | 9.40E+07 | 3  |
| 14 | 2209000001 | 2317000000 | 3 | 1.08E+08 | 2  |
| 14 | 2296000001 | 2317000000 | 3 | 2.10E+07 | 2  |
| 14 | 2302000001 | 2317000000 | 3 | 1.50E+07 | 4  |
| 14 | 2302000001 | 2317000000 | 4 | 1.50E+07 | 2  |
| 14 | 2303000001 | 2317000000 | 3 | 1.40E+07 | 2  |
| 15 | 2317000001 | 2420000000 | 3 | 1.03E+08 | 18 |
| 16 | 2420000001 | 2495000000 | 3 | 7.50E+07 | 2  |
| 16 | 2420000001 | 2496000000 | 3 | 7.60E+07 | 2  |
| 16 | 2420000001 | 2497000000 | 3 | 7.70E+07 | 4  |
| 16 | 2420000001 | 2511000000 | 3 | 9.10E+07 | 5  |
| 16 | 2495000001 | 2511000000 | 5 | 1.60E+07 | 2  |
| 16 | 2496000001 | 2511000000 | 4 | 1.50E+07 | 2  |
| 16 | 2497000001 | 2511000000 | 4 | 1.40E+07 | 4  |
| 17 | 2511000001 | 2521000000 | 3 | 1.00E+07 | 2  |
| 17 | 2511000001 | 2522000000 | 3 | 1.10E+07 | 7  |
| 17 | 2511000001 | 2593000000 | 2 | 8.20E+07 | 4  |
| 17 | 2511000001 | 2593000000 | 3 | 8.20E+07 | 3  |
| 17 | 2521000001 | 2593000000 | 2 | 7.20E+07 | 2  |
| 17 | 2522000001 | 2593000000 | 2 | 7.10E+07 | 7  |
| 18 | 2593000001 | 2672000000 | 3 | 7.90E+07 | 13 |
| 19 | 2672000001 | 2711000000 | 3 | 3.90E+07 | 4  |
| 19 | 2672000001 | 2732000000 | 3 | 6.00E+07 | 13 |
| 19 | 2711000001 | 2732000000 | 2 | 2.10E+07 | 4  |

|    |            |            |   |          |    |
|----|------------|------------|---|----------|----|
| 20 | 2732000001 | 2796000000 | 3 | 6.40E+07 | 17 |
| 21 | 2796000001 | 2837000000 | 2 | 4.10E+07 | 2  |
| 21 | 2796000001 | 2838000000 | 2 | 4.20E+07 | 2  |
| 21 | 2796000001 | 2845000000 | 2 | 4.90E+07 | 13 |
| 21 | 2796000001 | 2845000000 | 3 | 4.90E+07 | 2  |
| 22 | 2845000001 | 2897000000 | 2 | 5.20E+07 | 10 |
| 22 | 2845000001 | 2897000000 | 3 | 5.20E+07 | 8  |
| X  | 2898000001 | 3017000000 | 3 | 1.19E+08 | 2  |
| X  | 2898000001 | 3018000000 | 3 | 1.20E+08 | 8  |
| X  | 2898000001 | 3018000000 | 4 | 1.20E+08 | 2  |
| X  | 3017000001 | 3054000000 | 5 | 3.70E+07 | 2  |
| X  | 3018000001 | 3054000000 | 5 | 3.60E+07 | 10 |



## **Descriptions of Supplementary datasets**

**Supplementary Dataset 1.** Normalized read depth plots for a bin size of 1 Mb for all samples compared are available at <http://www.msl.ubc.ca/sites/default/files/pdata/kaston-leung/Leung-et-al-supplementary-dataset-1.zip>. The names and SD in reads per 1-Mb bin of each sample can be found in Table S4. Inferred copy numbers are indicated by the color of the datapoint for each bin as indicated in <http://www.msl.ubc.ca/sites/default/files/pdata/kaston-leung/CNV-legend-1.pdf>.

**Supplementary Dataset 2.** Normalized read depth plots for 100-kb and 10-kb bins for all single 184-hTERT droplet MDA samples sequenced to high depth are available at <http://www.msl.ubc.ca/sites/default/files/pdata/kaston-leung/Leung-et-al-supplementary-dataset-2.zip>. The names and SD in reads per 1-Mb bin of each sample can be found in Table S4. Inferred copy numbers are indicated by the color of the datapoint for each bin as indicated in <http://www.msl.ubc.ca/sites/default/files/pdata/kaston-leung/CNV-legend-2.pdf>.

**Supplementary Dataset 3.** Normalized read depth plots for 1 Mb bins for all 30 TOV2295 single-cell droplet MDA samples sequenced to low depth, and read depth plots for 100-kb and 10-kb bins for the 8 single-cell droplet MDA samples sequenced to high depth are available at <http://www.msl.ubc.ca/sites/default/files/pdata/kaston-leung/Leung-et-al-supplementary-dataset-3.zip>. Inferred copy numbers are indicated by the color of the datapoint for each bin as indicated in <http://www.msl.ubc.ca/sites/default/files/pdata/kaston-leung/CNV-legend-1.pdf>.

**Supplementary Dataset 4.** Normalized read depth plots for 1-Mb bins for all single-nuclei droplet MDA samples from two high-grade serous ovarian cancer tumour specimens are available at <http://www.msl.ubc.ca/sites/default/files/pdata/kaston-leung/Leung-et-al-supplementary-dataset-4.zip>. Inferred copy numbers are indicated by the color of the datapoint for each bin as indicated in <http://www.msl.ubc.ca/sites/default/files/pdata/kaston-leung/CNV-legend-1.pdf>.
